# Supplementary material for: Modular Synthesis and Biological Investigation of 5-Hydroxymethyl Dibenzyl Butyrolactones and Related Lignans
Source: PubMed Central journal article supplement (PMC6321111; doi:10.3390/molecules23123057), 2018-11-22

## **Supporting Information:**

### **Modular Synthesis and Biological Investigation of 3,4-dibenzyl-5-(hydroxymethyl)dihydrofuran-2(3*H*)-ones and Related Lignans**

(E)-Ethyl 4-(3',4'-dimethoxyphenyl)but-2-enoate **16**

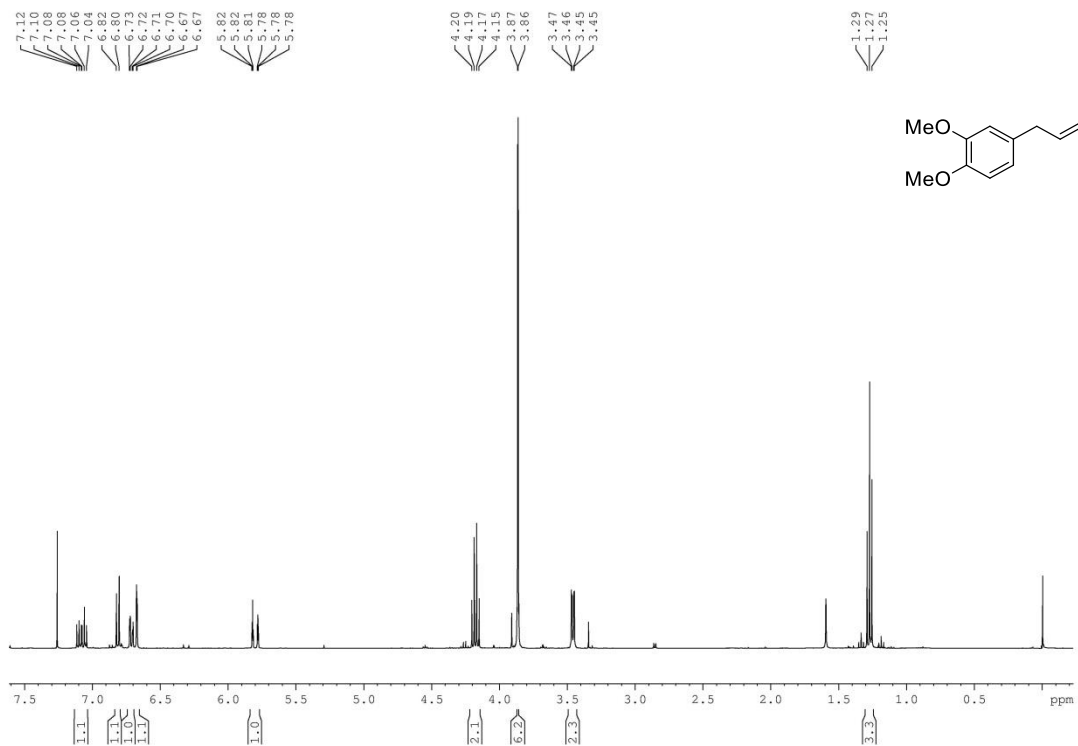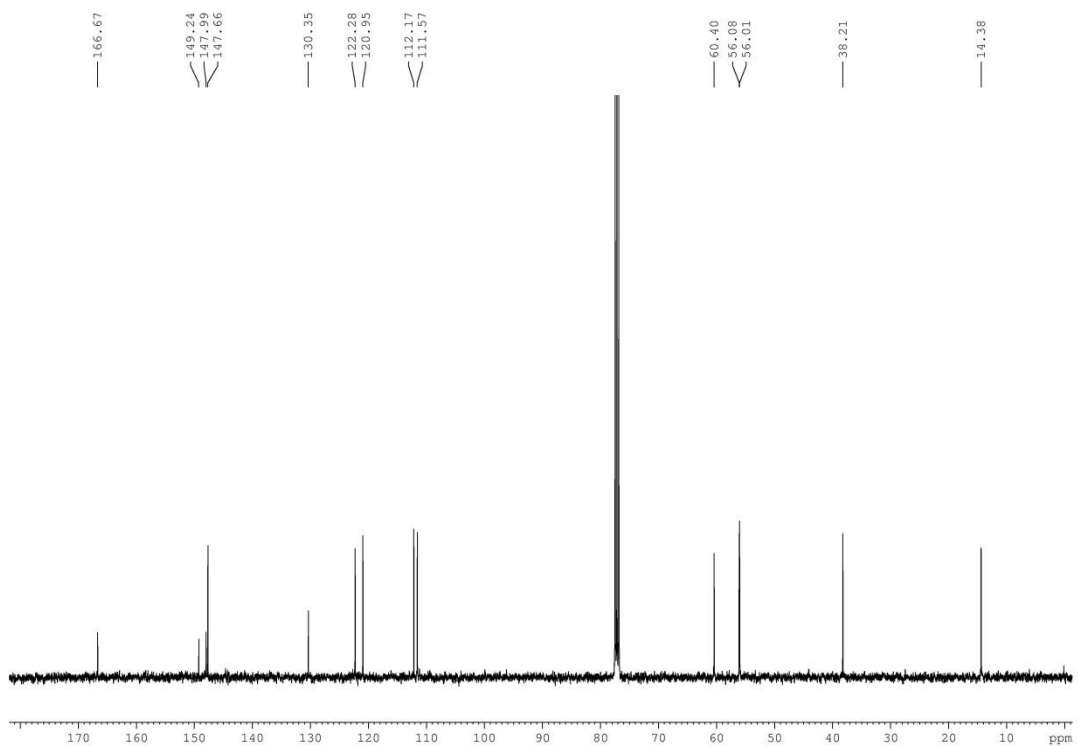

(E)-4-(3',4'-Dimethoxyphenyl)but-2-en-1-ol **18**

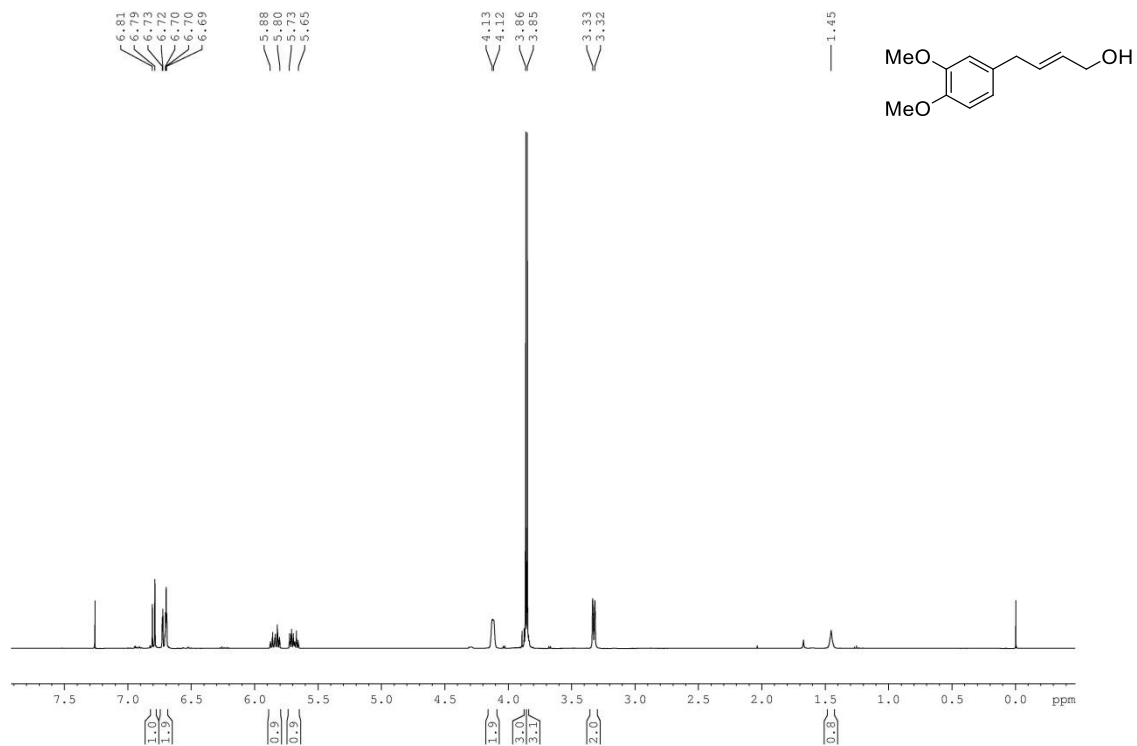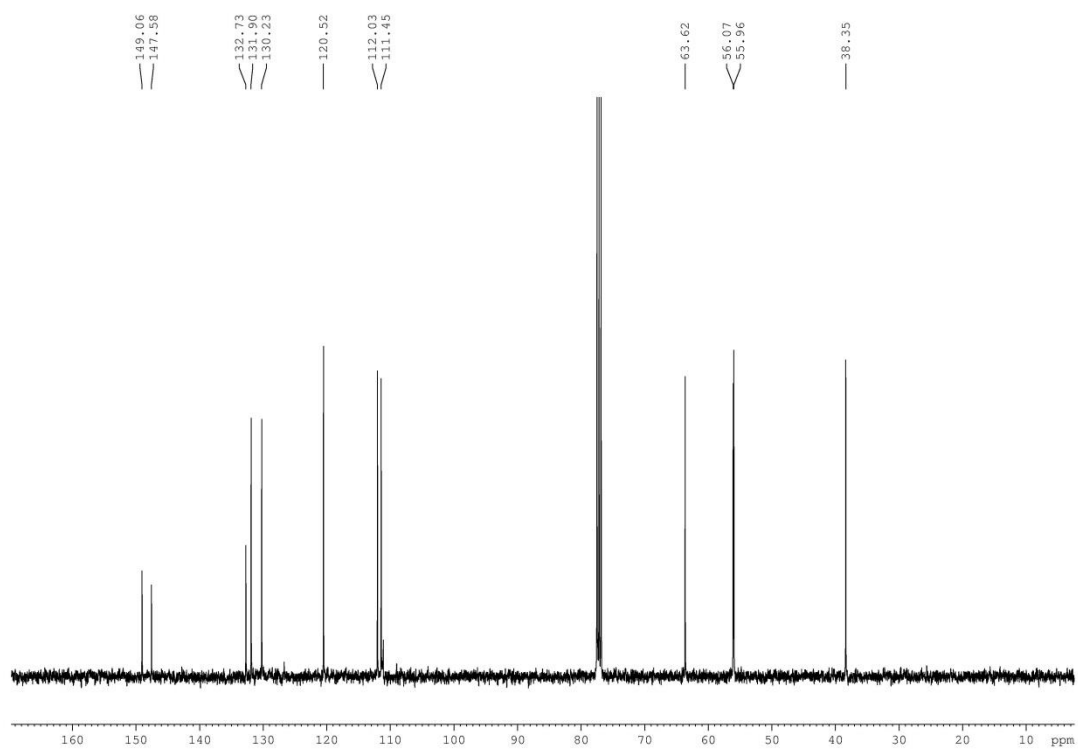

(E)-4-(4-(3',4'-Dimethoxyphenyl)but-2-en-1-yl)morpholine **9a**

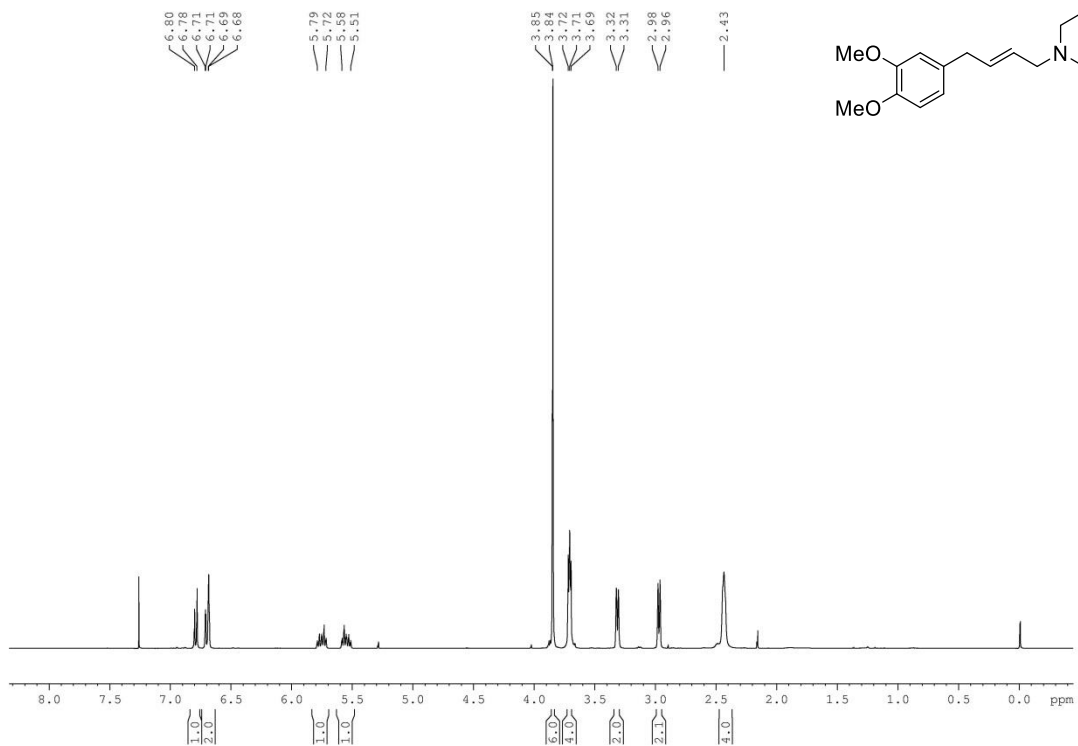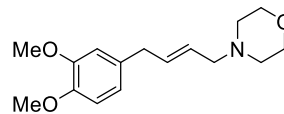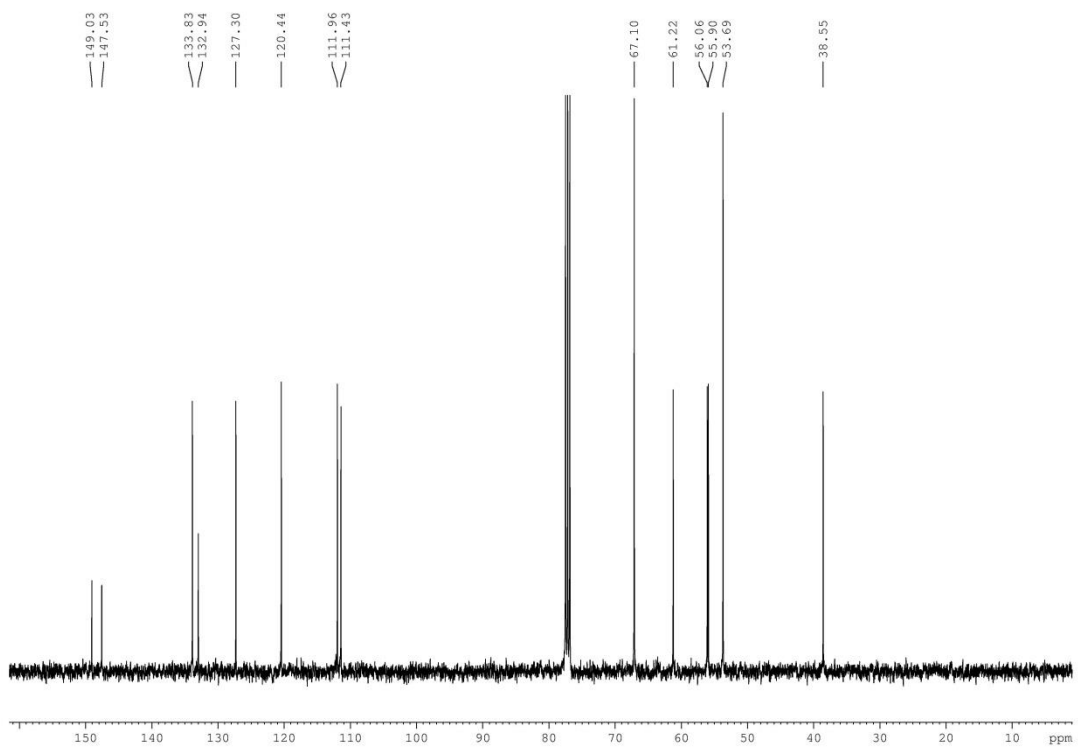

(E)-Ethyl 4-(3',4'-methylenedioxyphenyl)but-2-enoate **17**

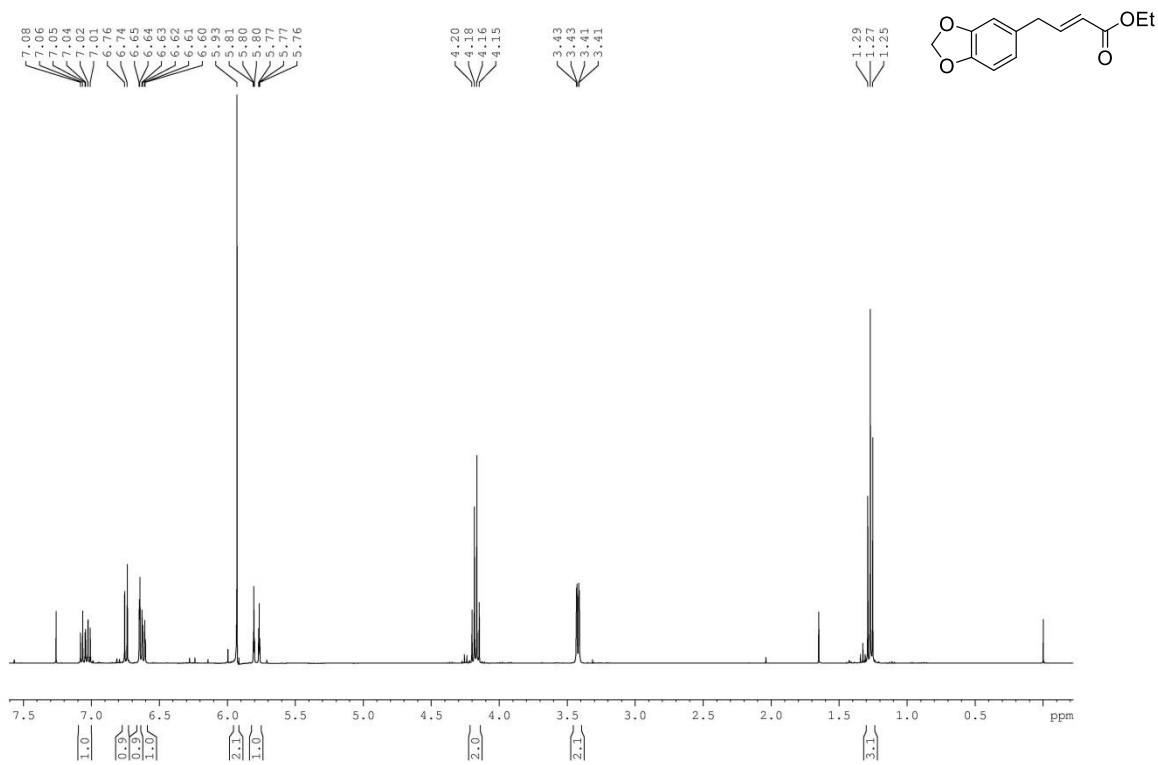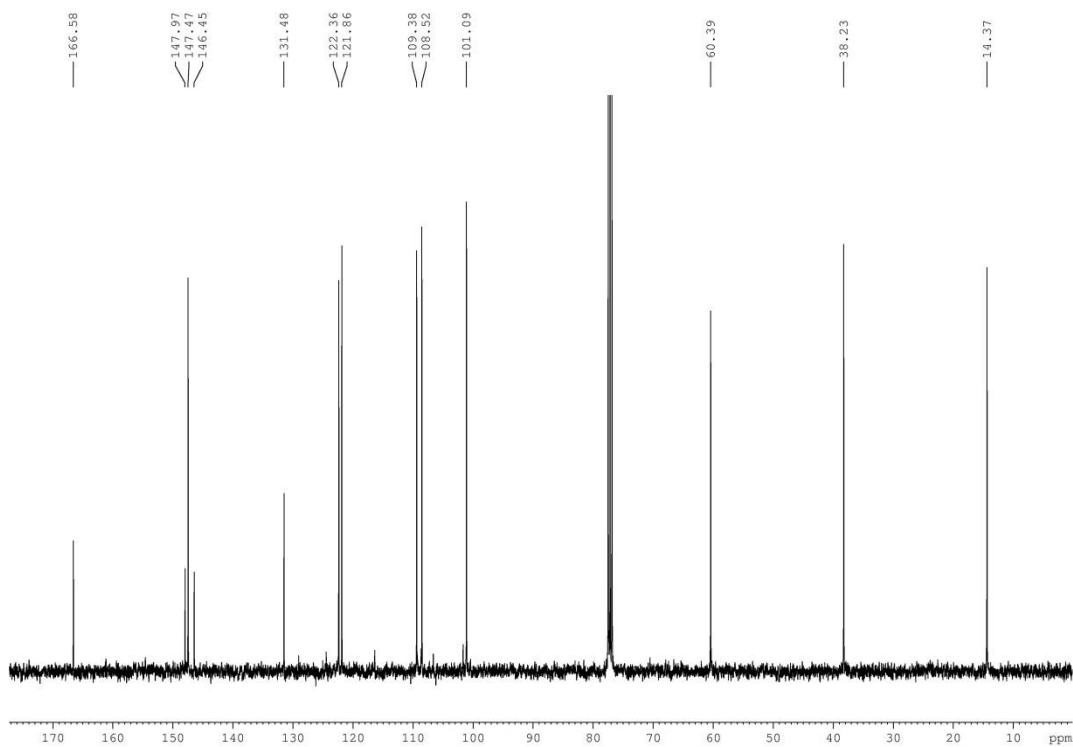

(E)-4-(3',4'-Methylenedioxyphenyl)but-2-en-1-ol **19**

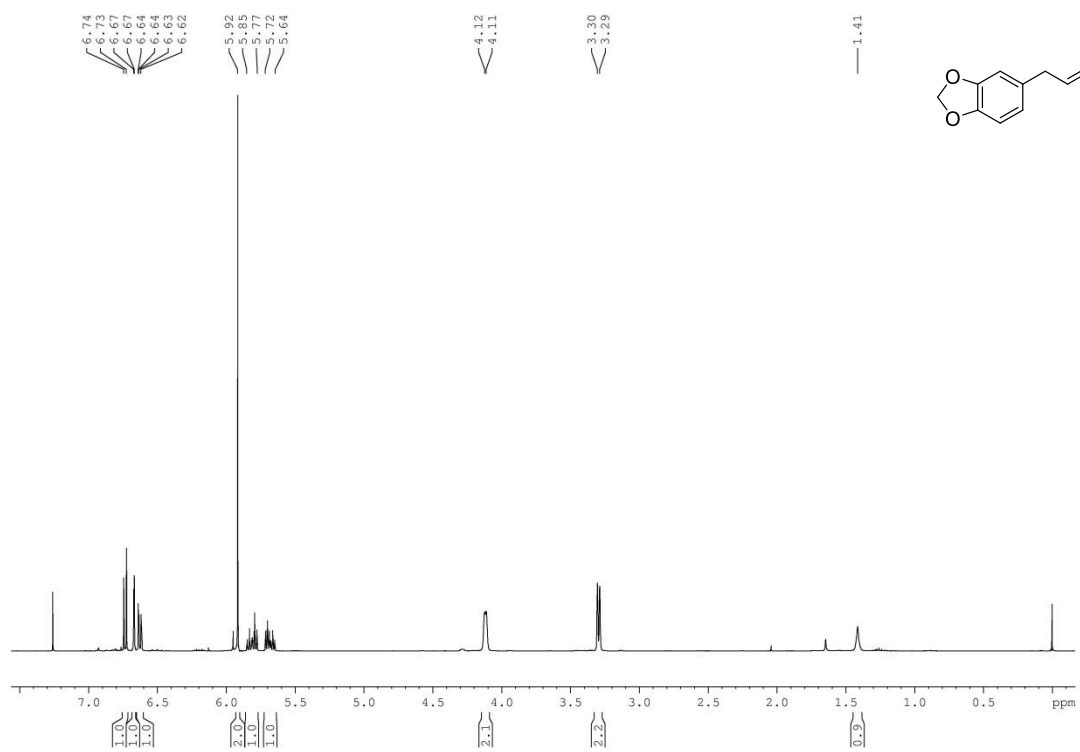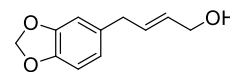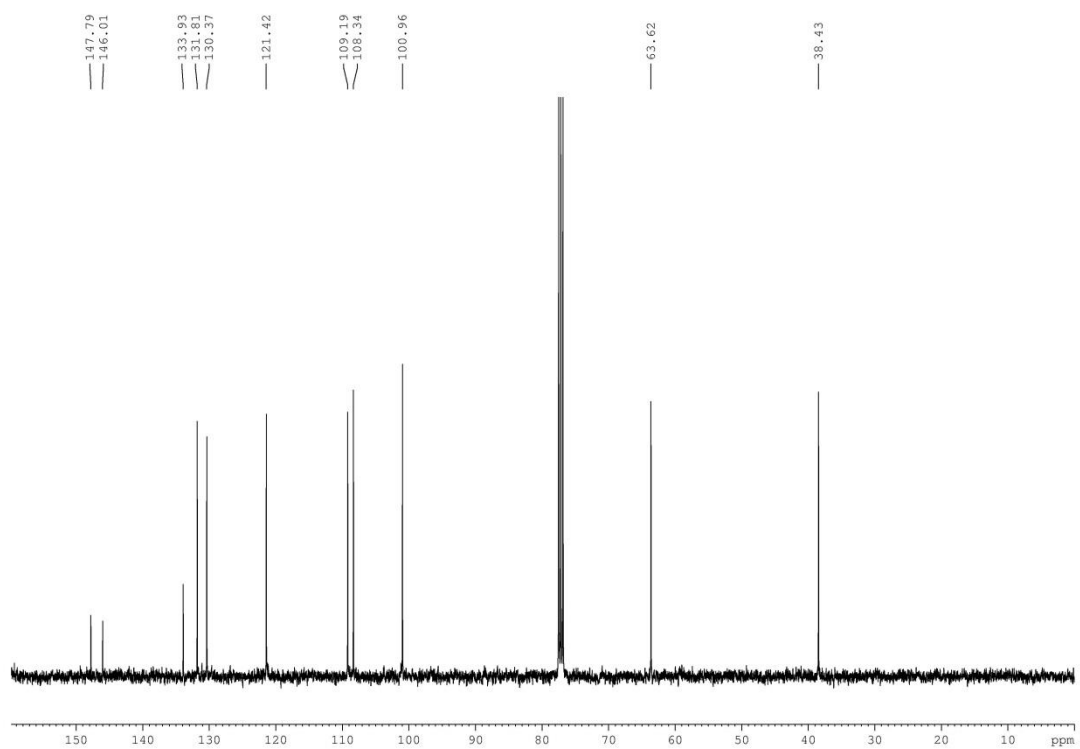

(E)-4-(4-(3',4'-Methylenedioxyphenyl)but-2-en-1-yl)morpholine **9b**

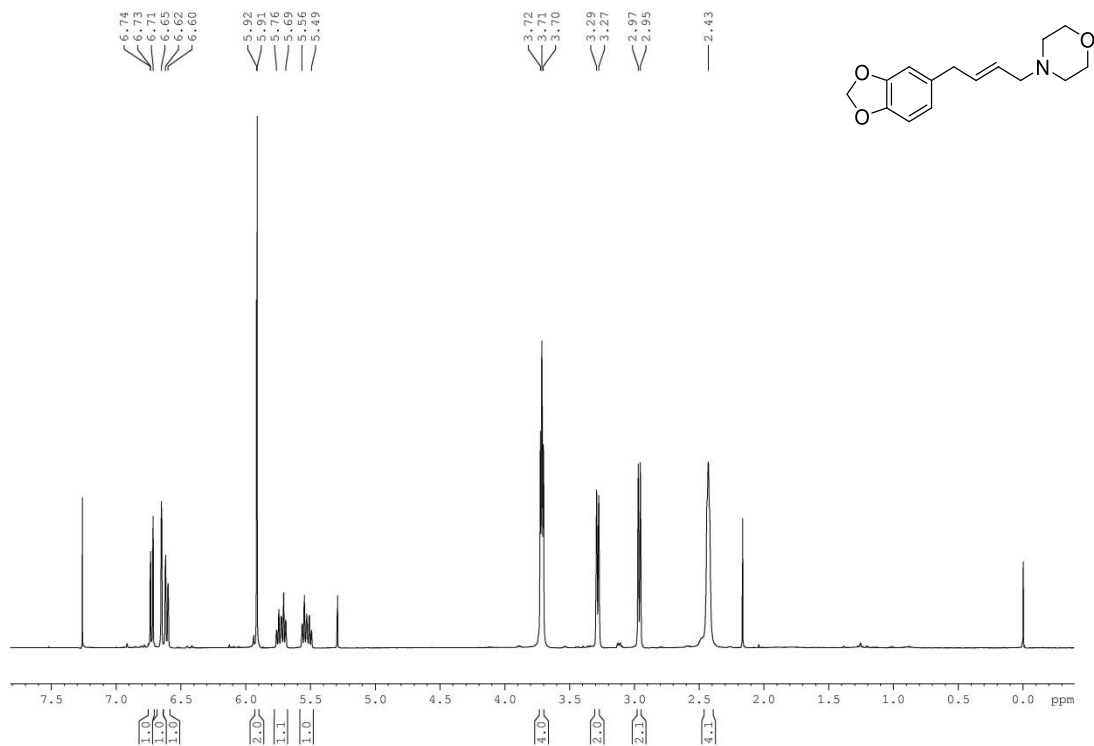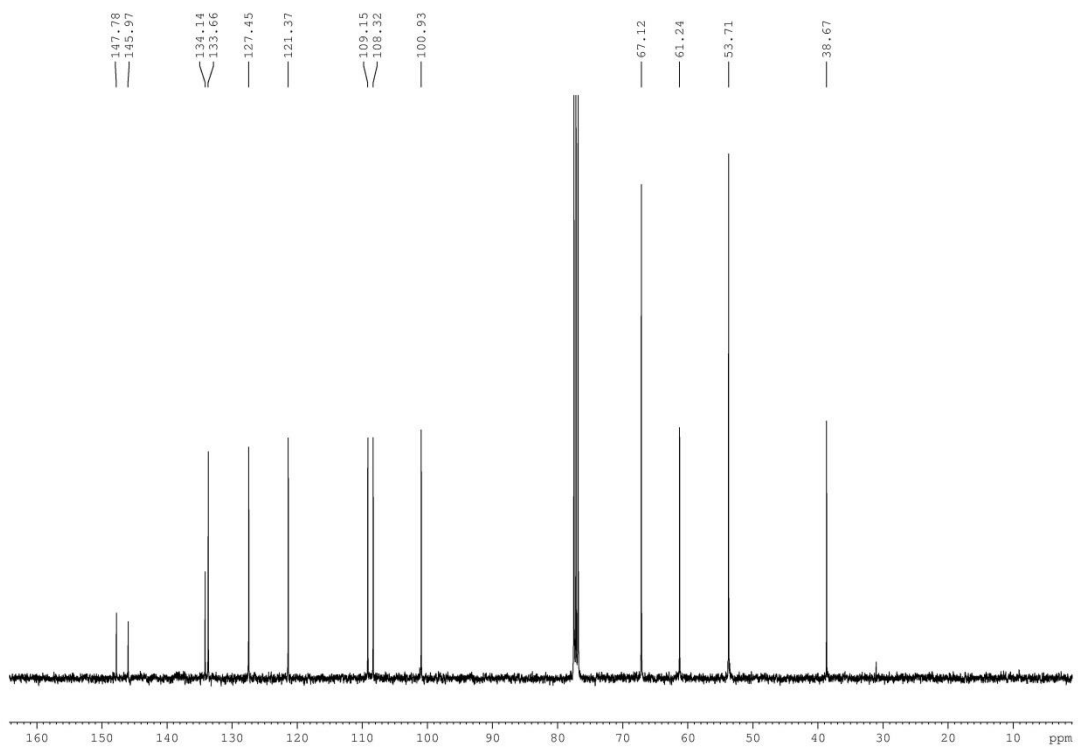

### 3-(3',4',5'-Trimethoxyphenyl)propionic acid **31**

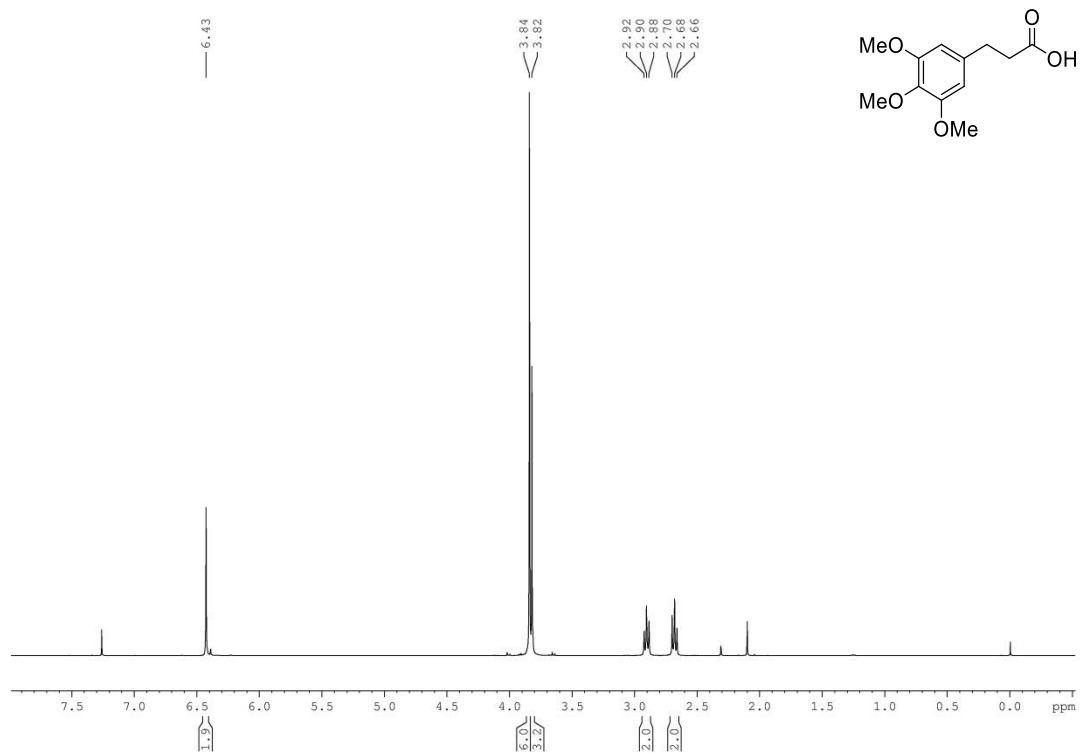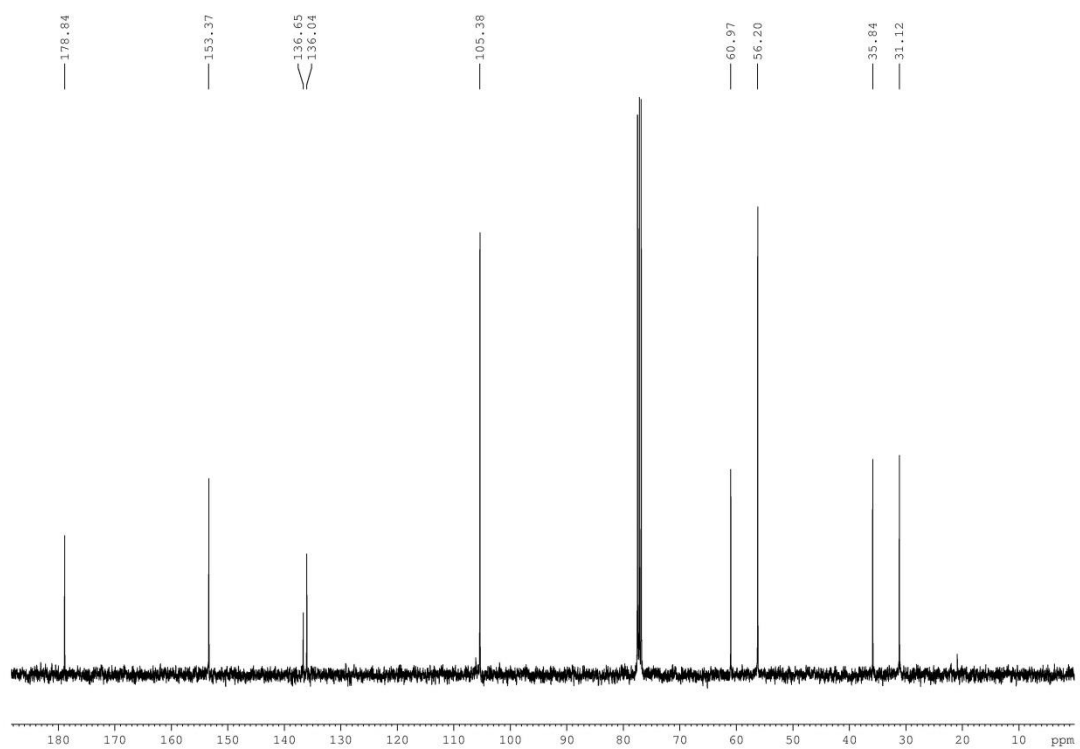



3-(3',4'-Methylenedioxyphenyl)propionic acid **30**

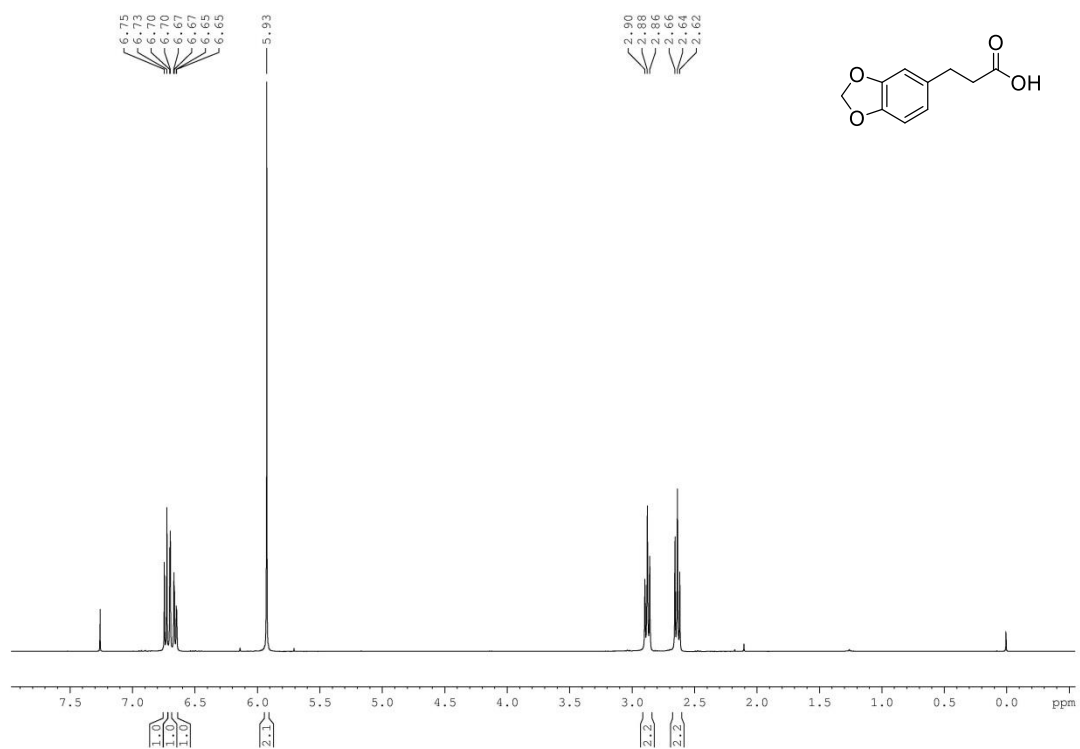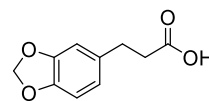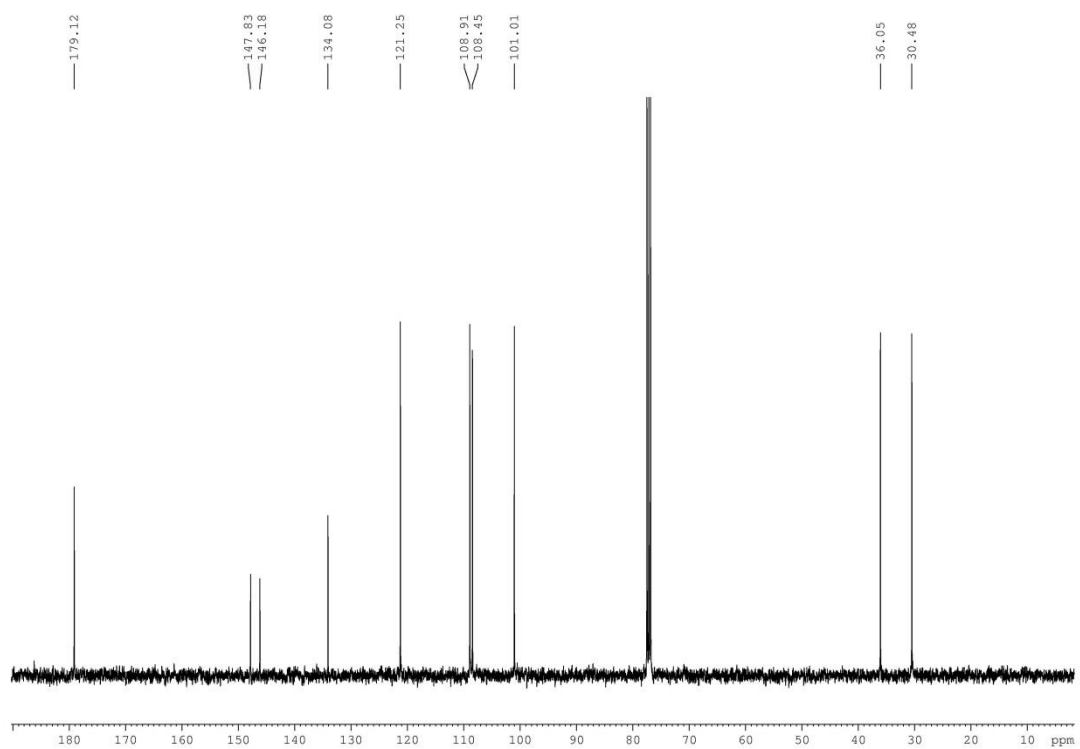

3-(3'-Methoxy-4'-benzyloxyphenyl)propionic acid **32**

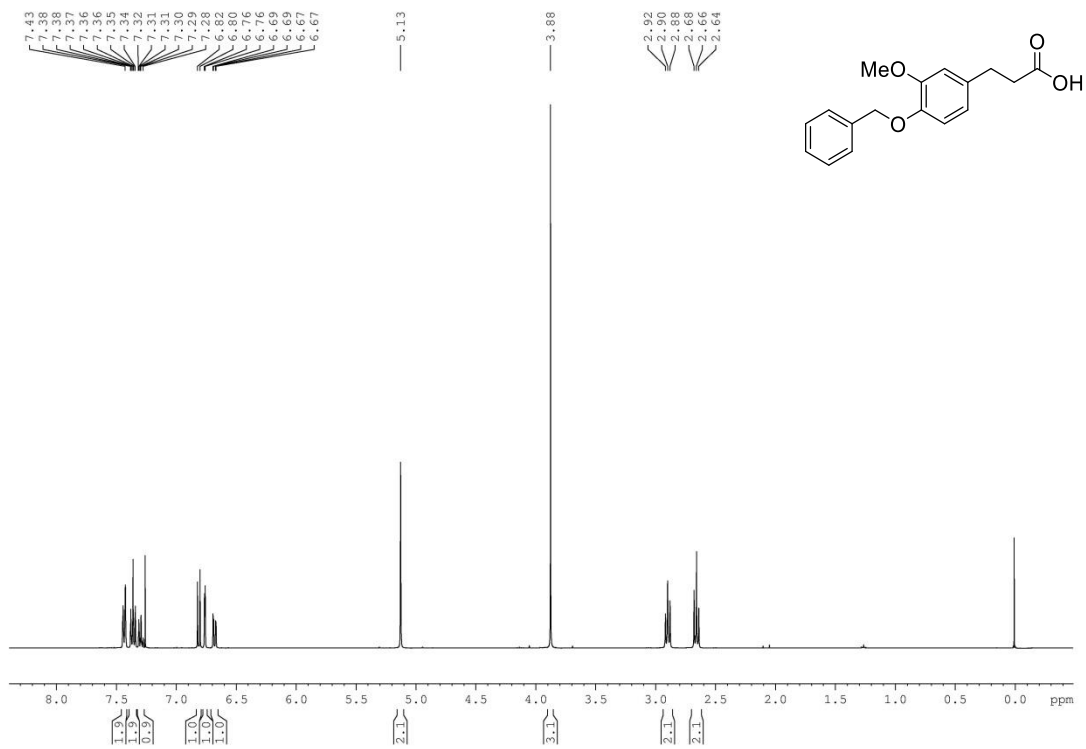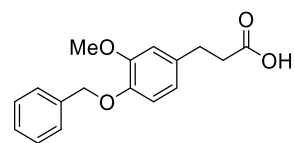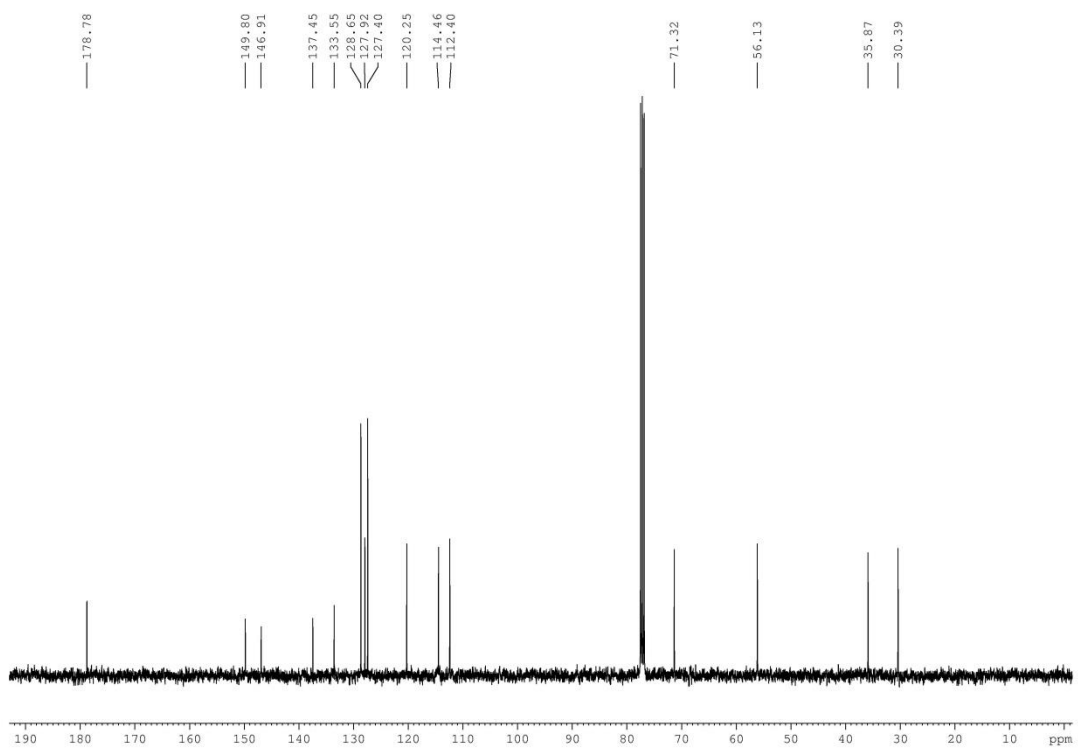

(2*R*\*,3*S*\*)-2-(3',4'-Methylenedioxybenzyl)-3-(3'',4''-dimethoxybenzyl)-1-morpholinopent-4-en-1-one  
**35ab**

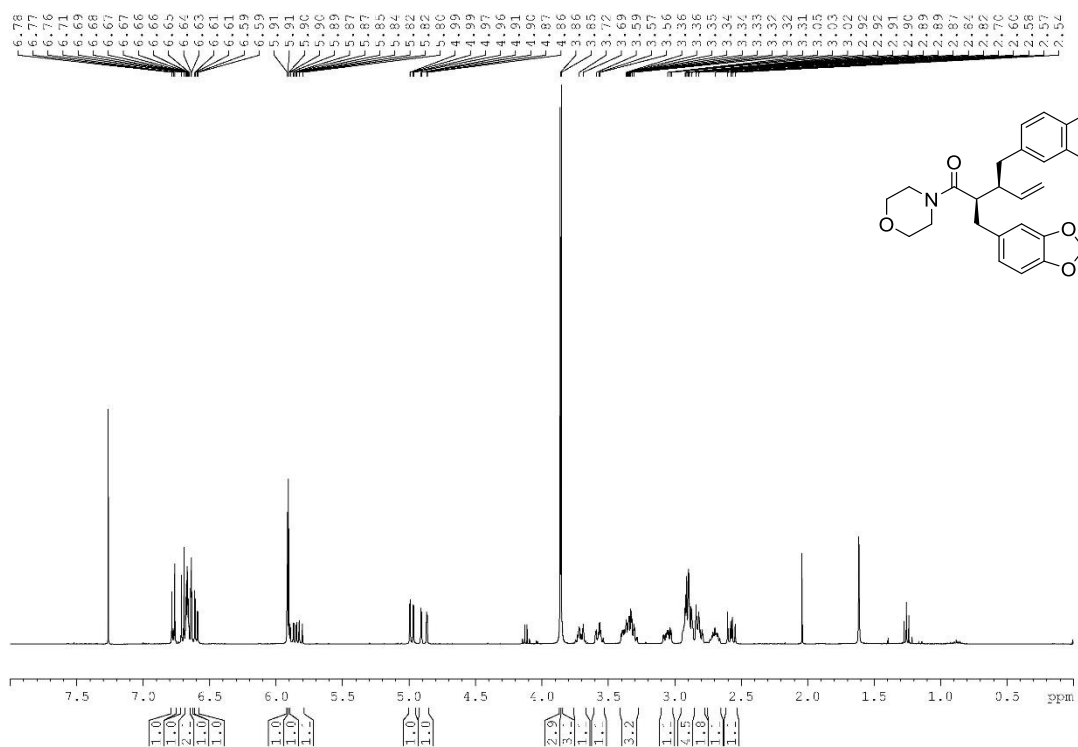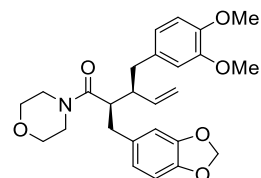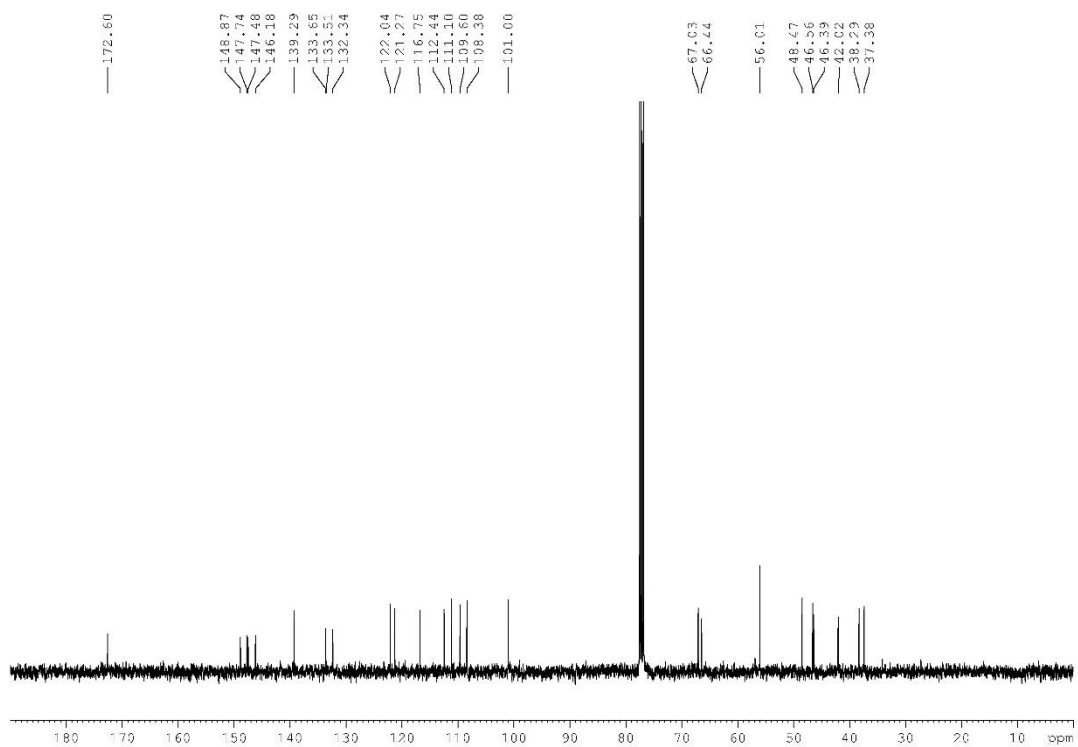

(2*R*\*,3*S*\*)-2-(3',4',5'-Trimethoxybenzyl)-3-(3'',4''-dimethoxybenzyl)-1-morpholinopent-4-en-1-one **35ac**

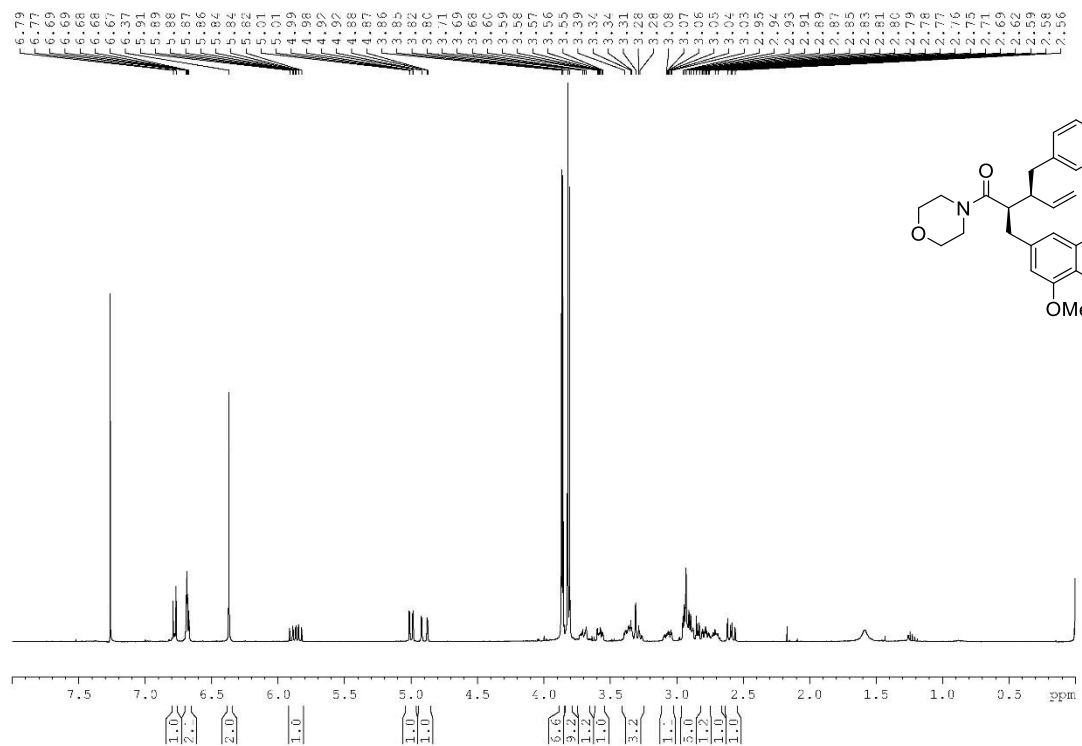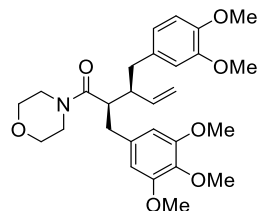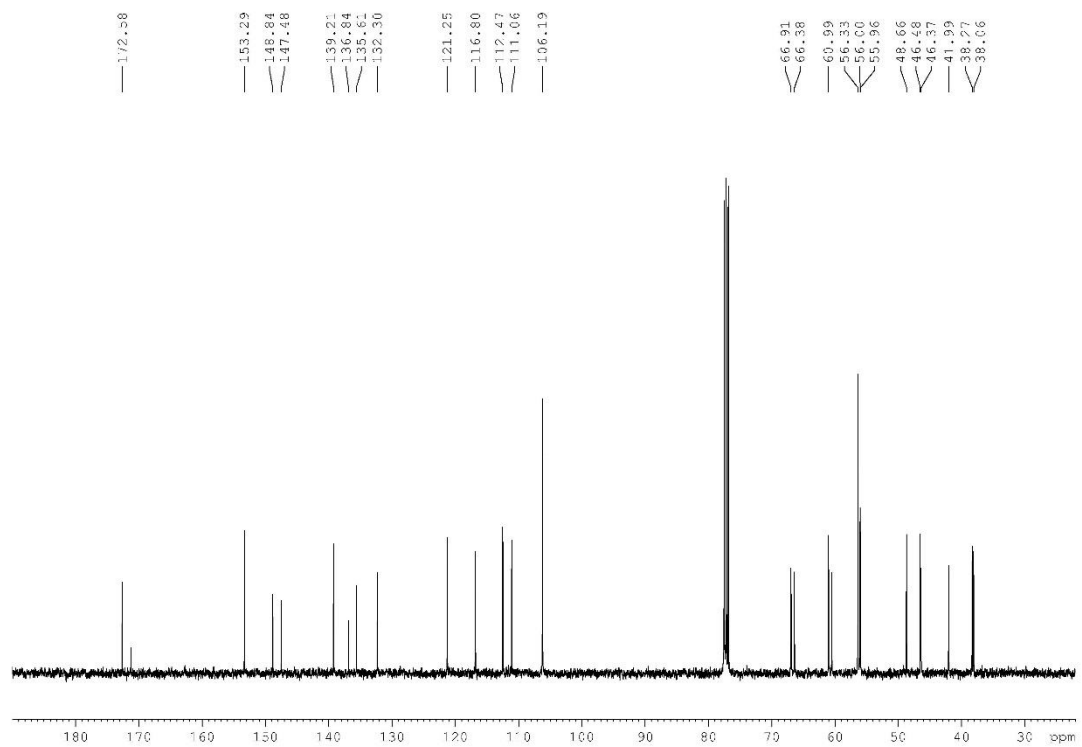

(2*R*\*,3*S*\*)-2-(3',4'-Dimethoxybenzyl)-3-(3'',4''-dimethoxybenzyl)-1-morpholinopent-4-en-1-one **35aa**

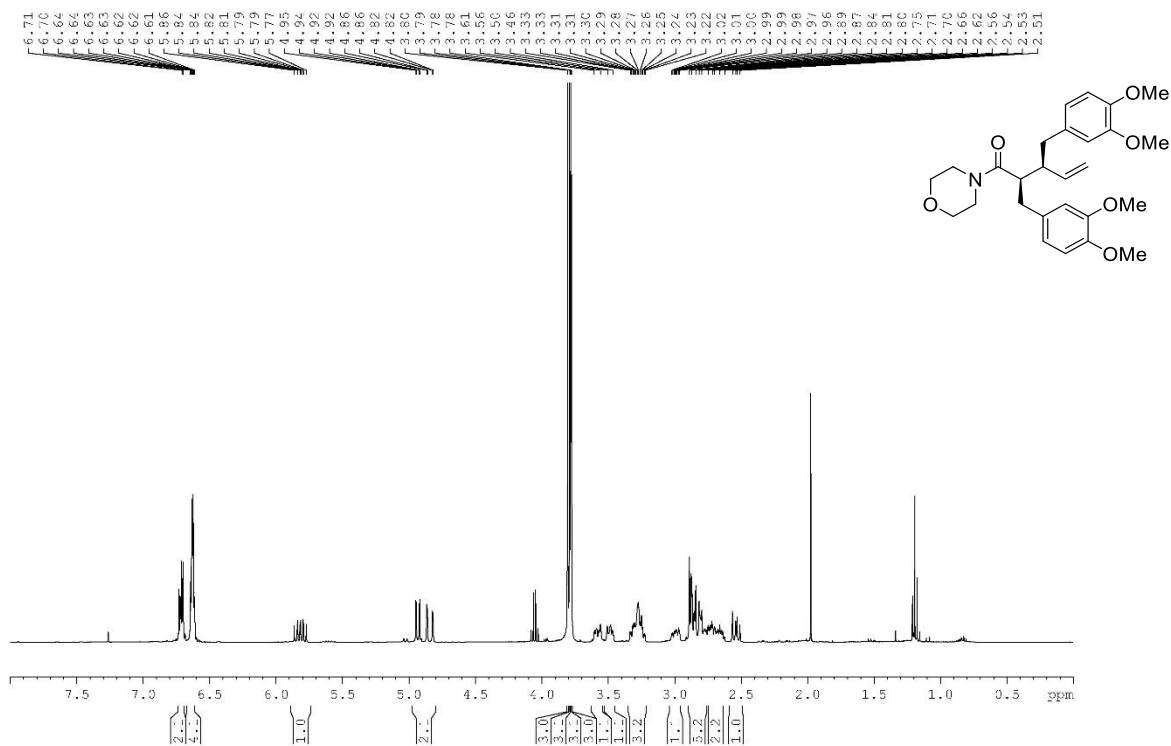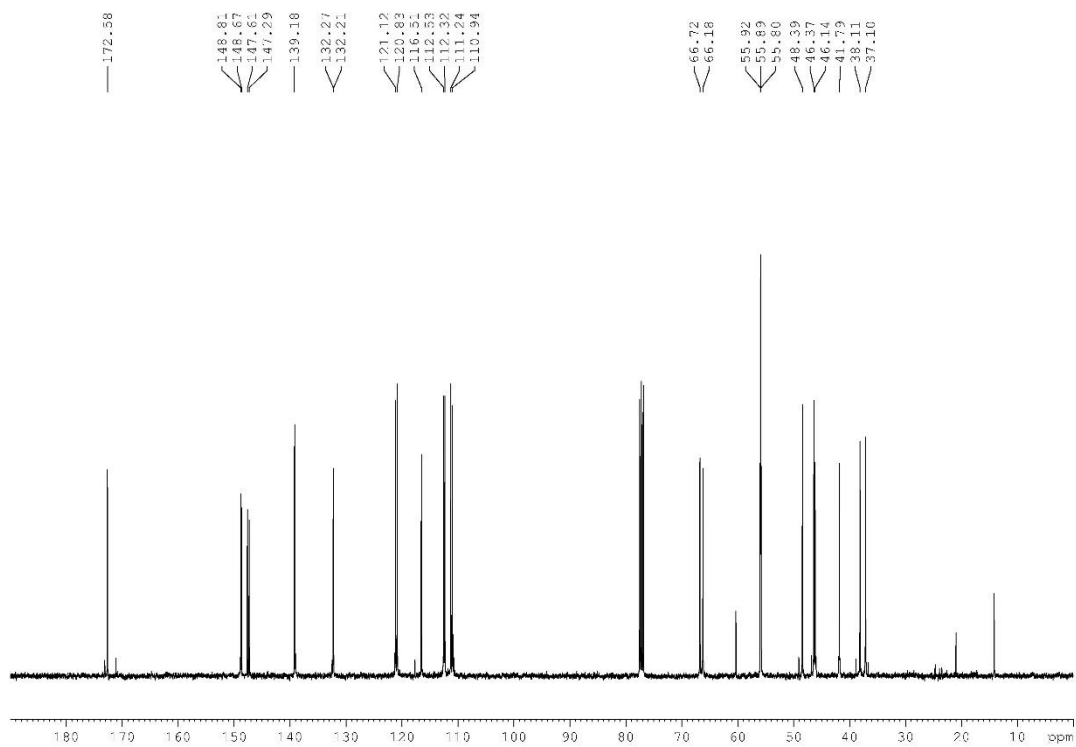

(2*R*\*,3*S*\*)-2-(3'-Methoxy-4'-benzyloxybenzyl)-3-(3'',4''-dimethoxybenzyl)-1-morpholino-pent-4-en-1-one **35ad**

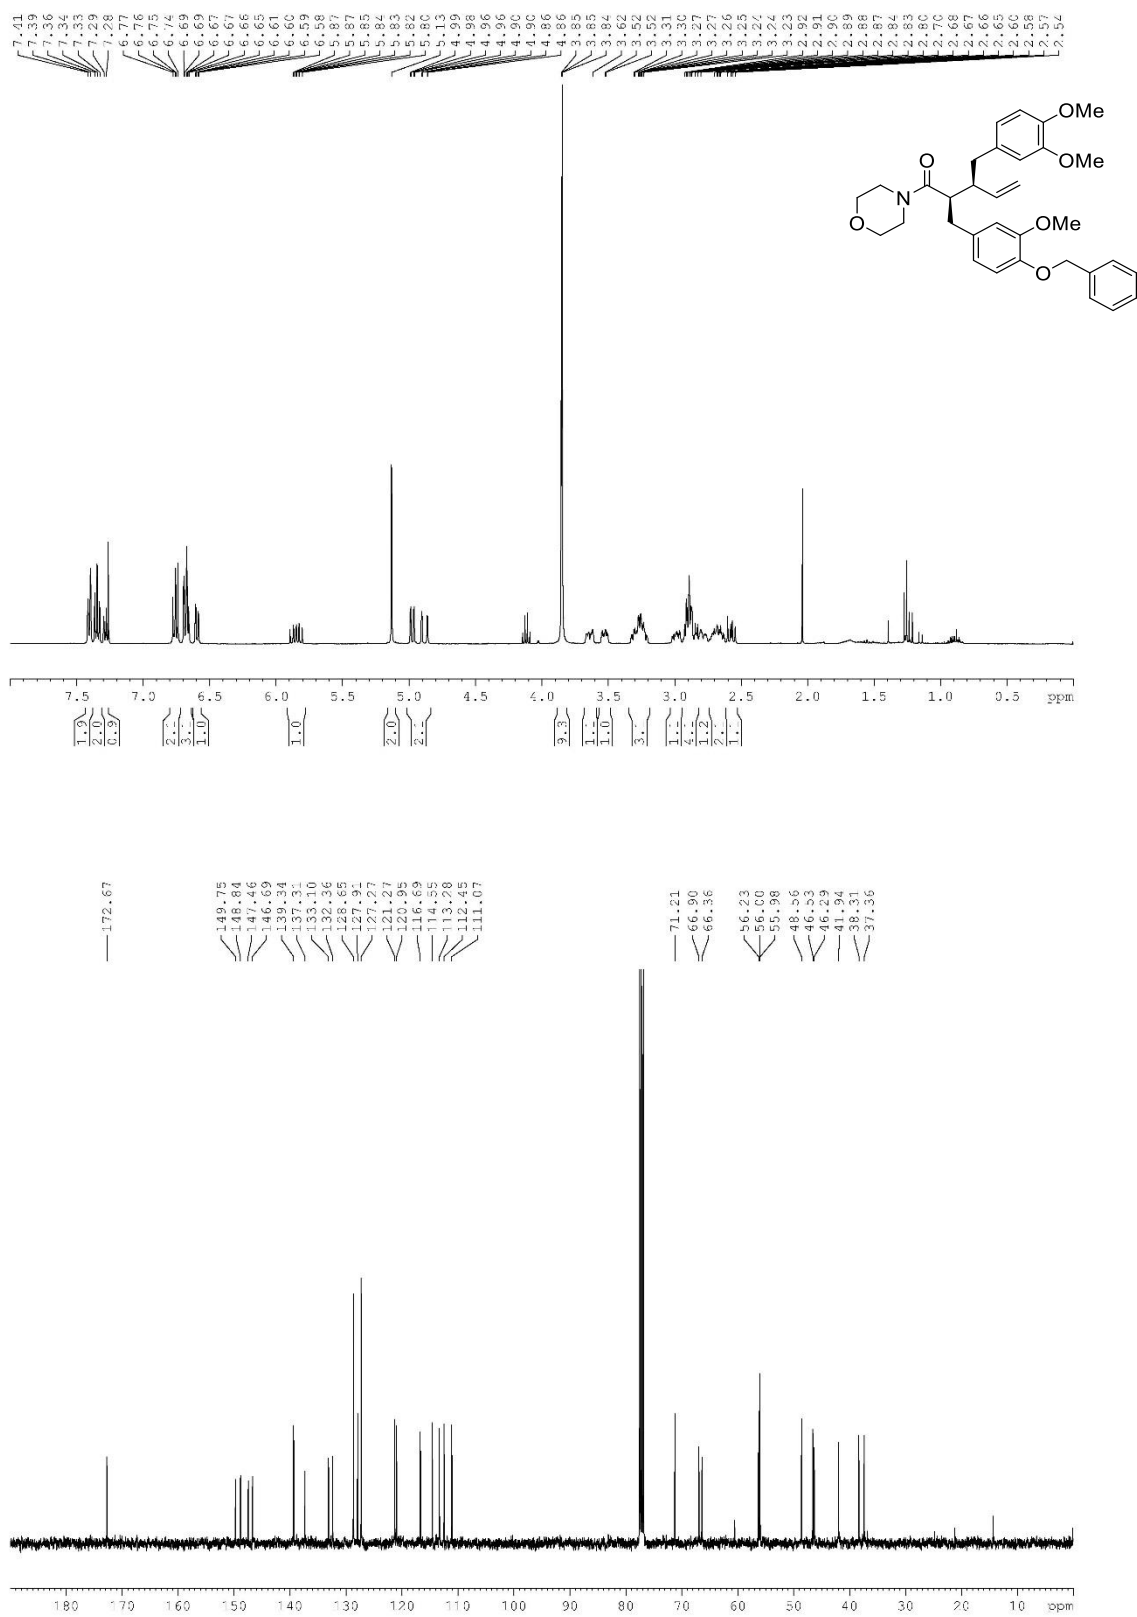

(2*R*\*,3*S*\*)-2-(3',4'-Dimethoxybenzyl)-3-(3'',4''-methylenedioxybenzyl)-1-morpholinopent-4-en-1-one  
**35ba**

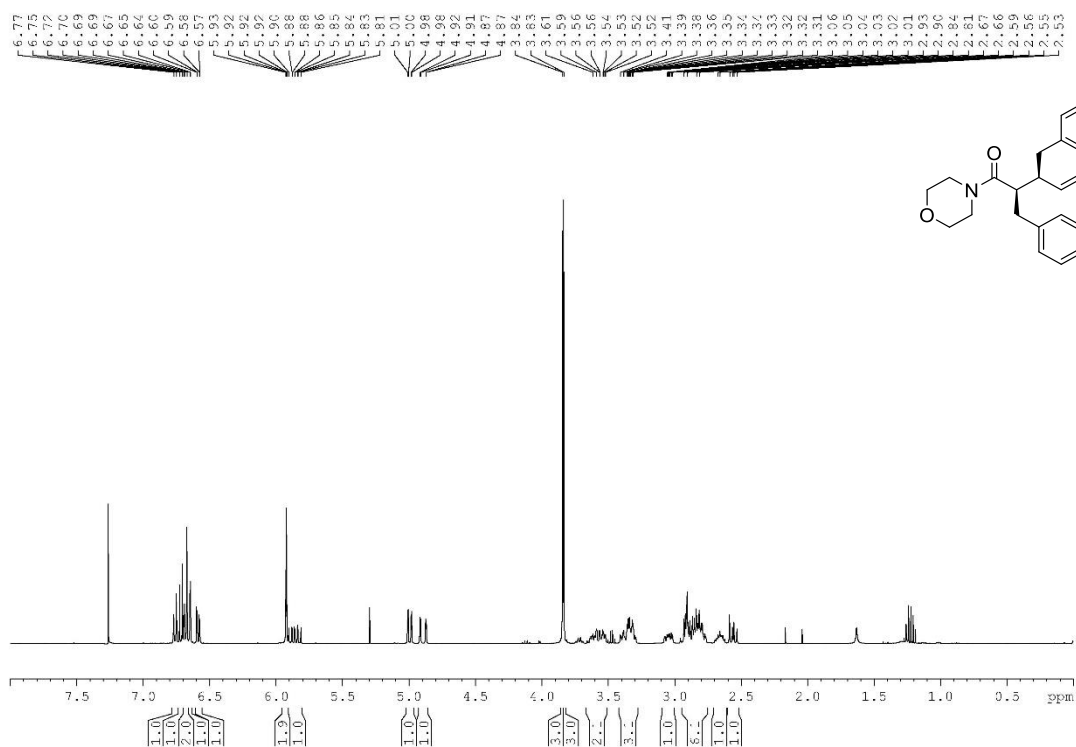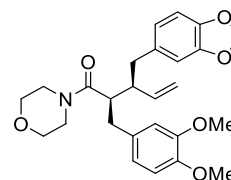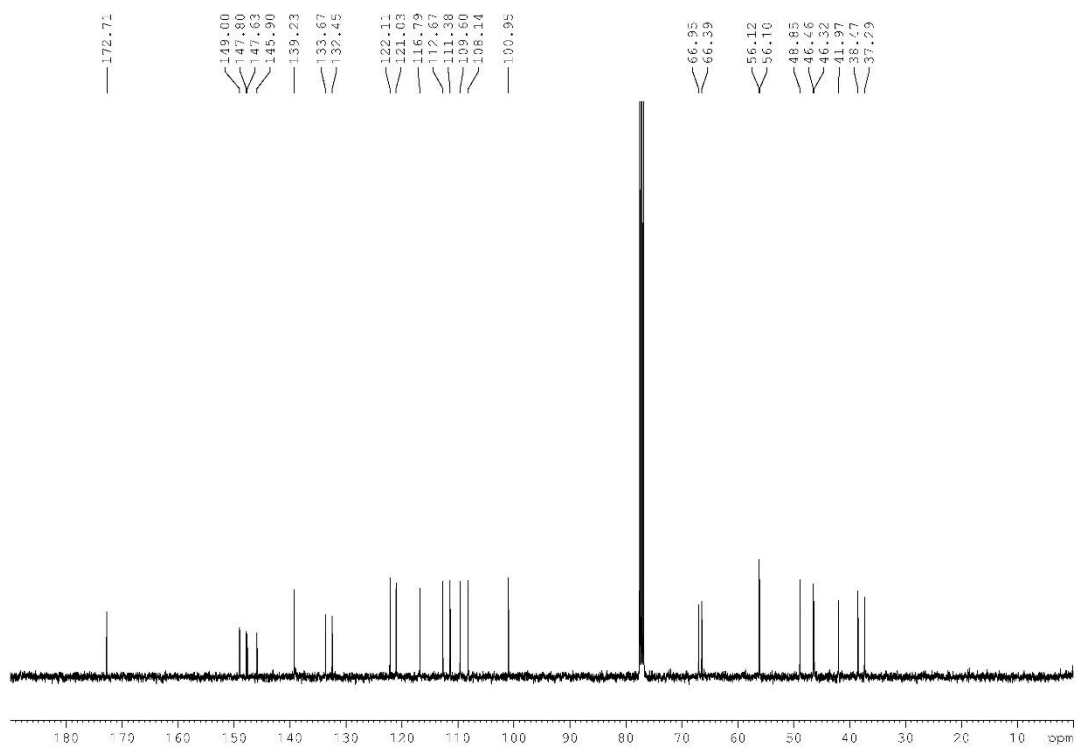

(2*R*\*,3*S*\*)-2-(3',4'-Methylenedioxybenzyl)-3-(3'',4''-methylenedioxybenzyl)-1-morpholinopent-4-en-1-one **35bb**

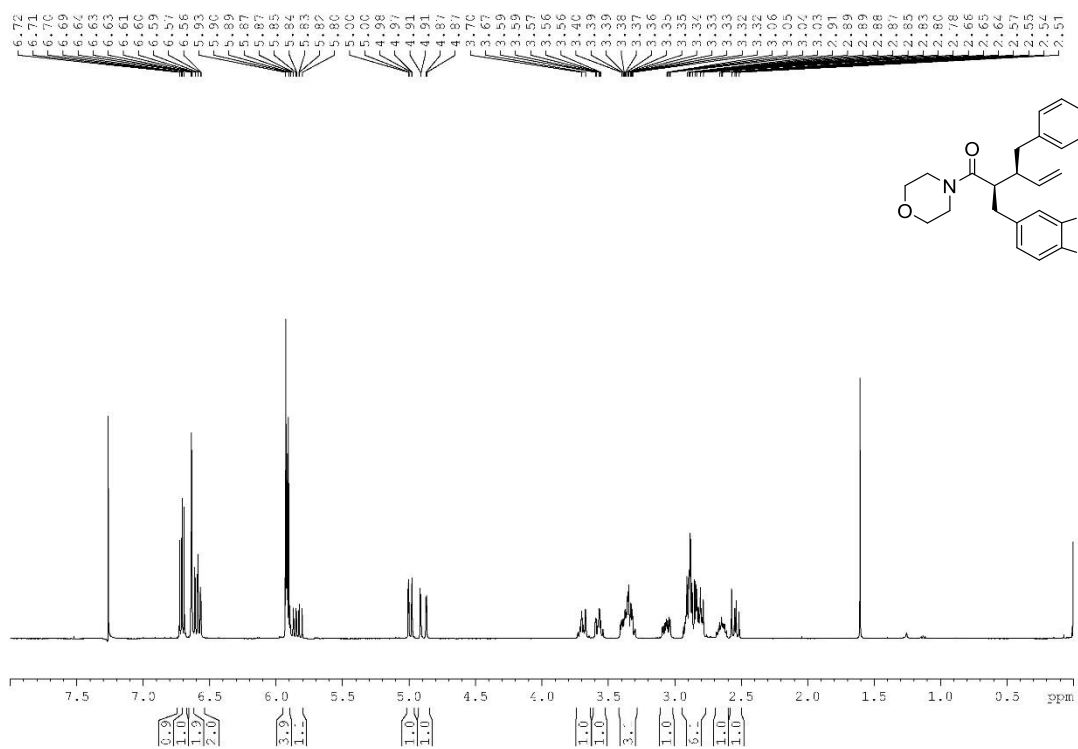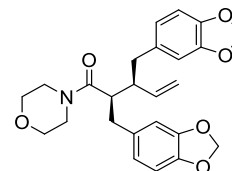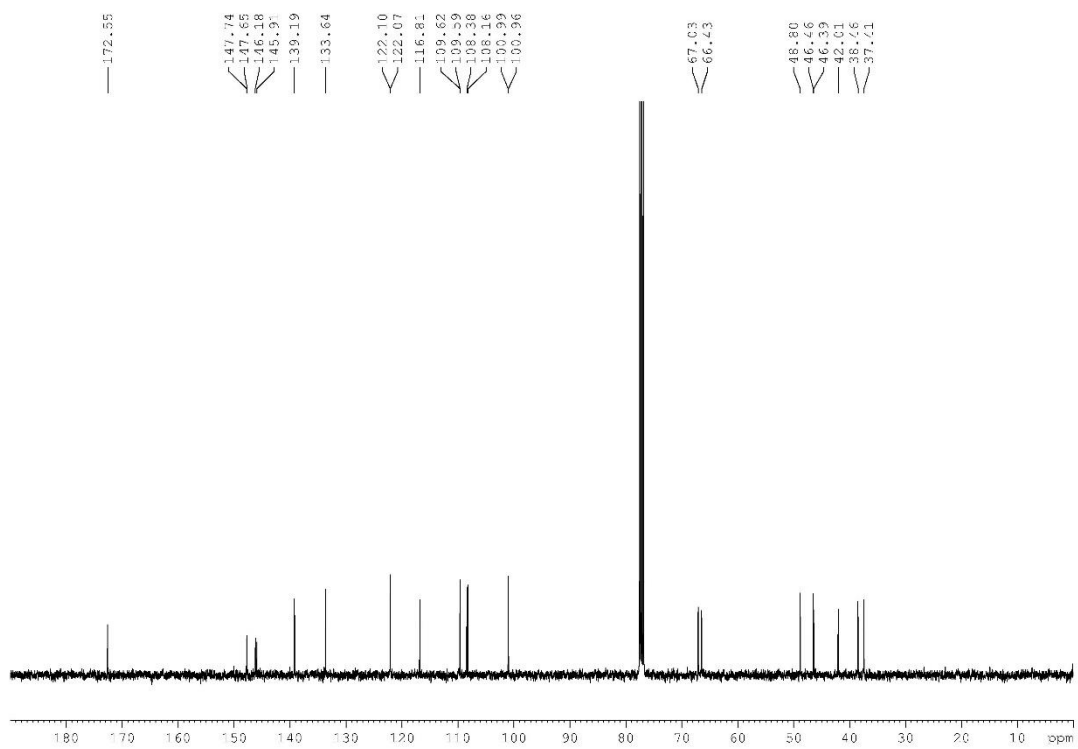



**(2R\*,3S\*)-2-(3',4',5'-Trimethoxybenzyl)-3-(3'',4''-methylenedioxybenzyl)-1-morpholinopent-4-en-1-one**  
**35bc**

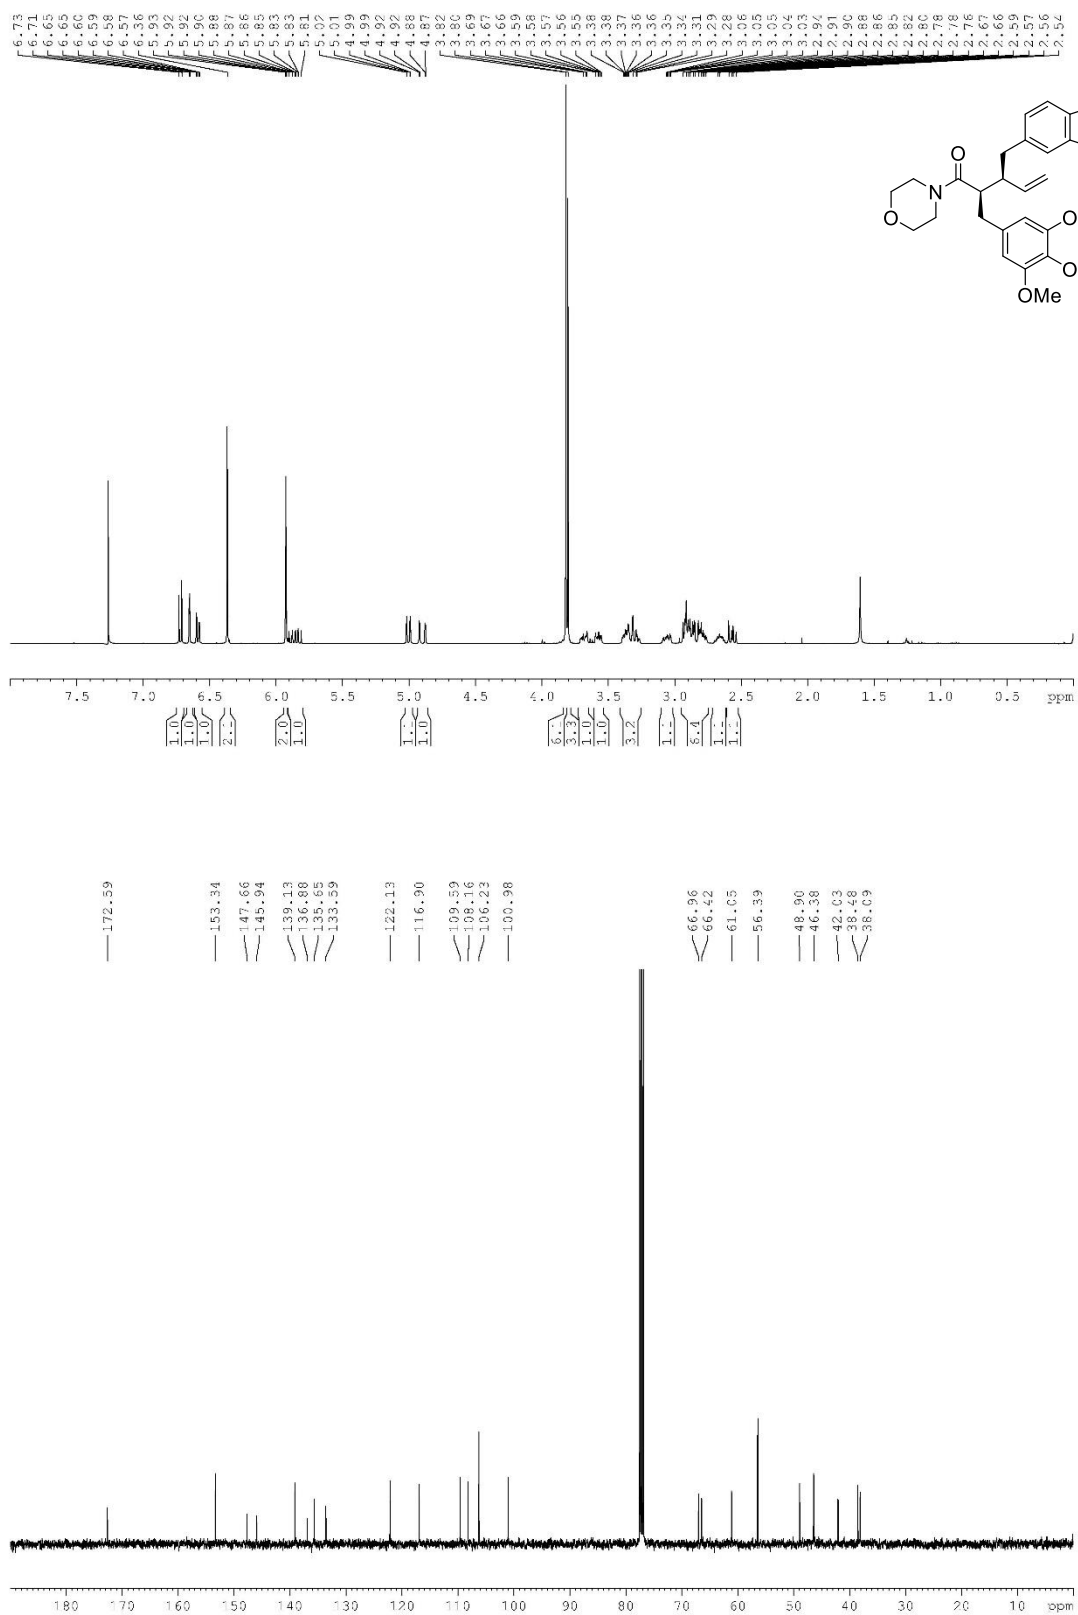

(2*R*\*,3*S*\*)-2-(3'-Methoxy-4'-benzyloxybenzyl)-3-(3'',4''-methylenedioxybenzyl)-1-morpholinopent-4-en-1-one **35bd**

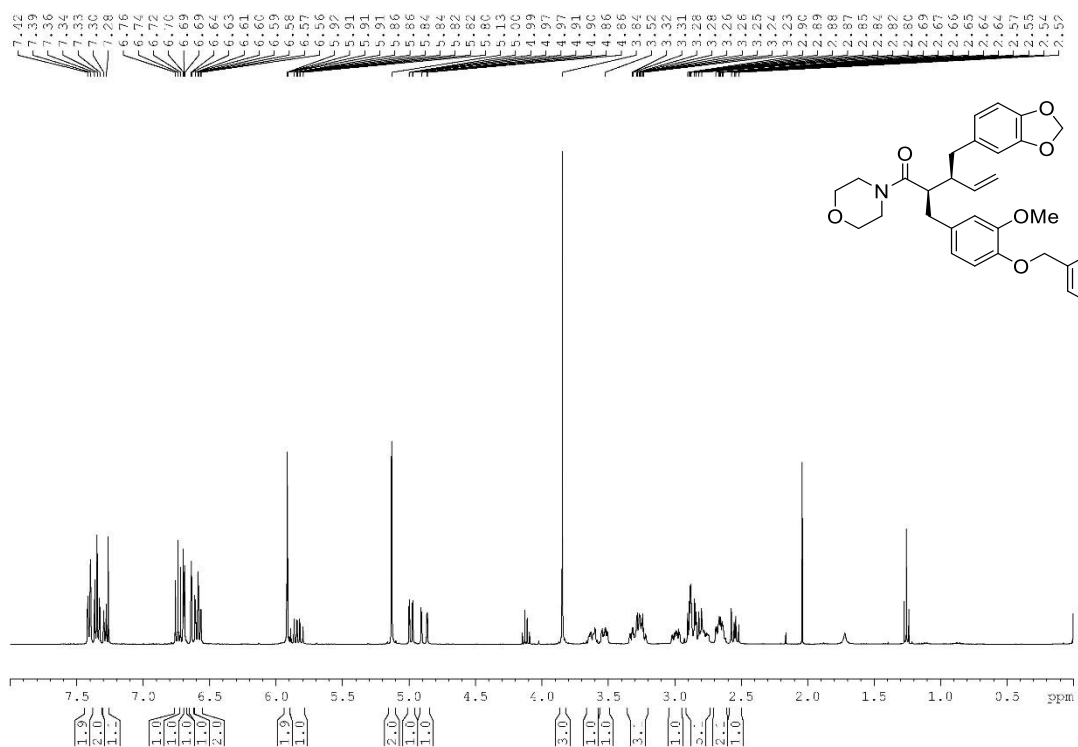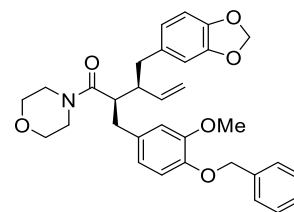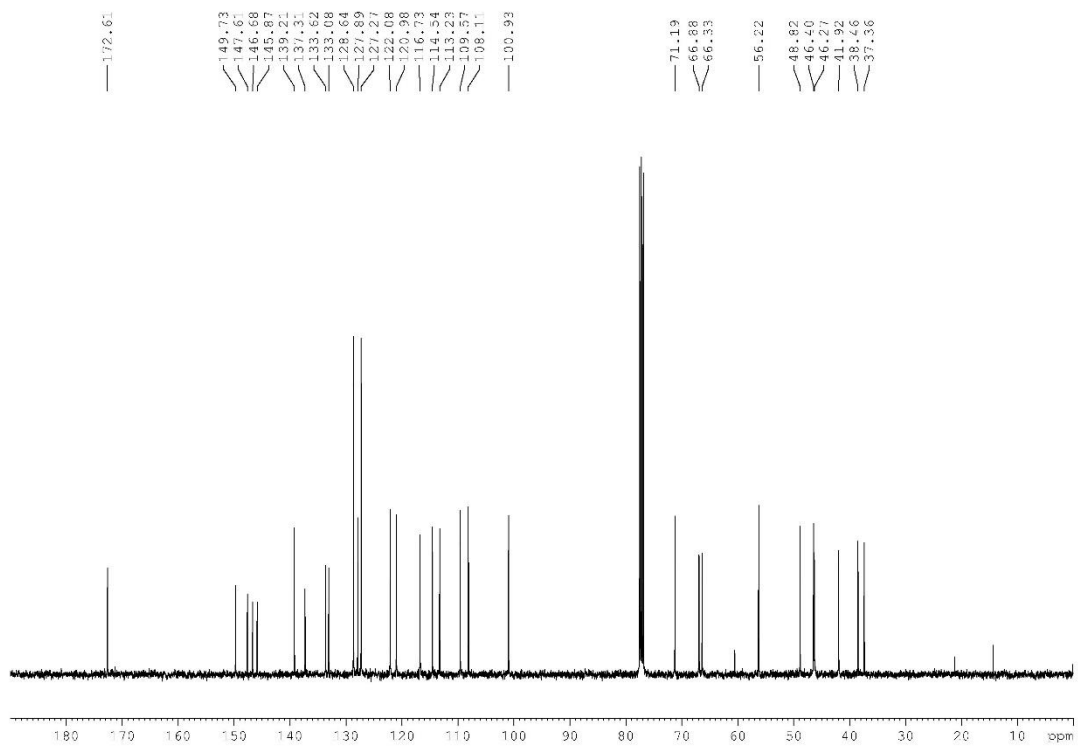

(3*R*\*,4*R*\*)-3-(3',4'-Methylenedioxybenzyl)-4-(3'',4''-dimethoxybenzyl)-5-(hydroxymethyl) dihydrofuran-2(3*H*)-one **4ab**

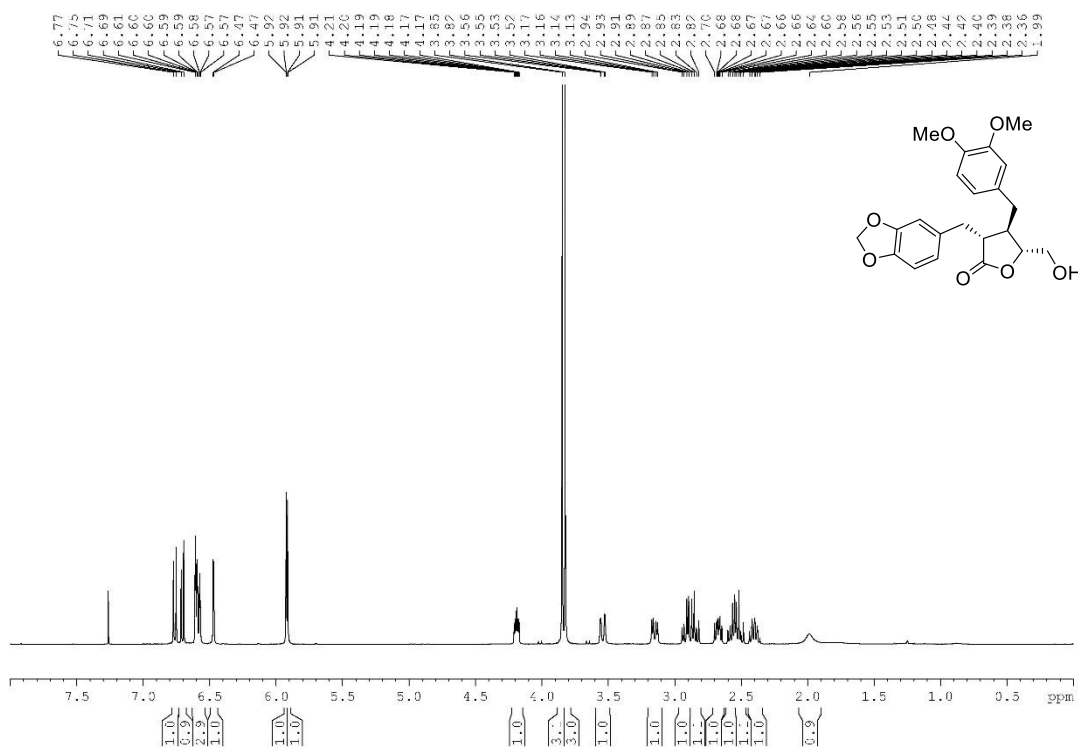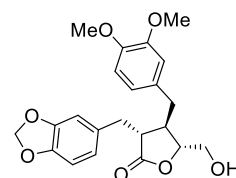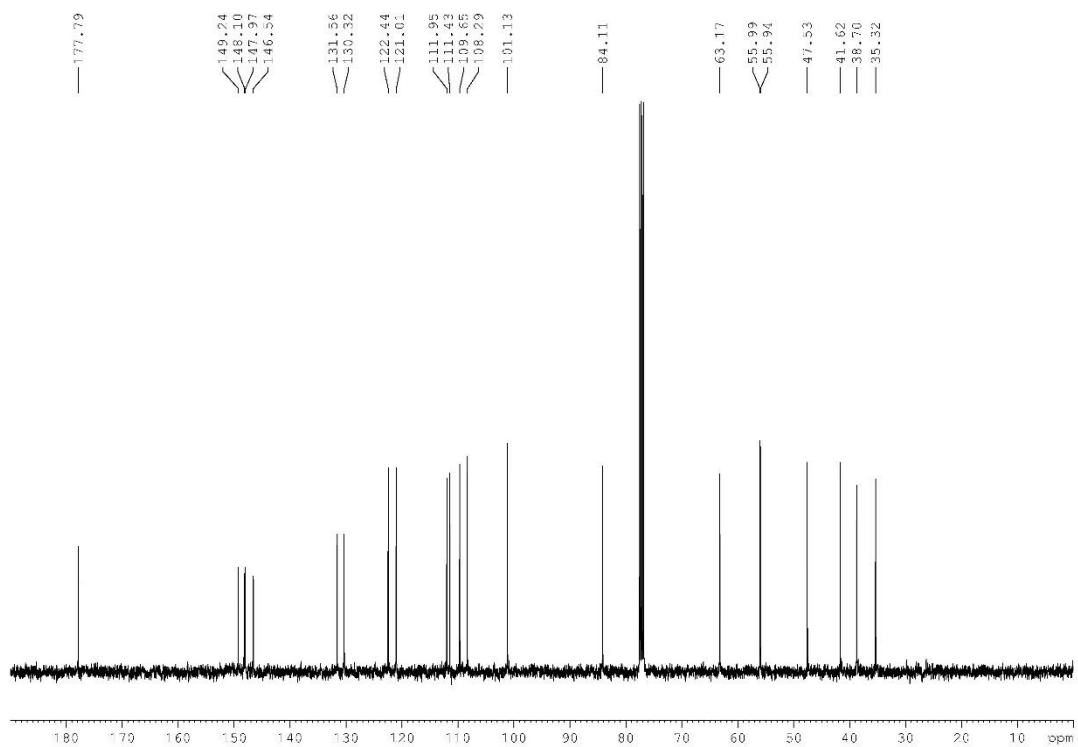

(3*R*\*,4*R*\*)-3,4-bis(3',4'-Dimethoxybenzyl)-5-(hydroxymethyl)dihydrofuran-2(3*H*)-one **4aa**

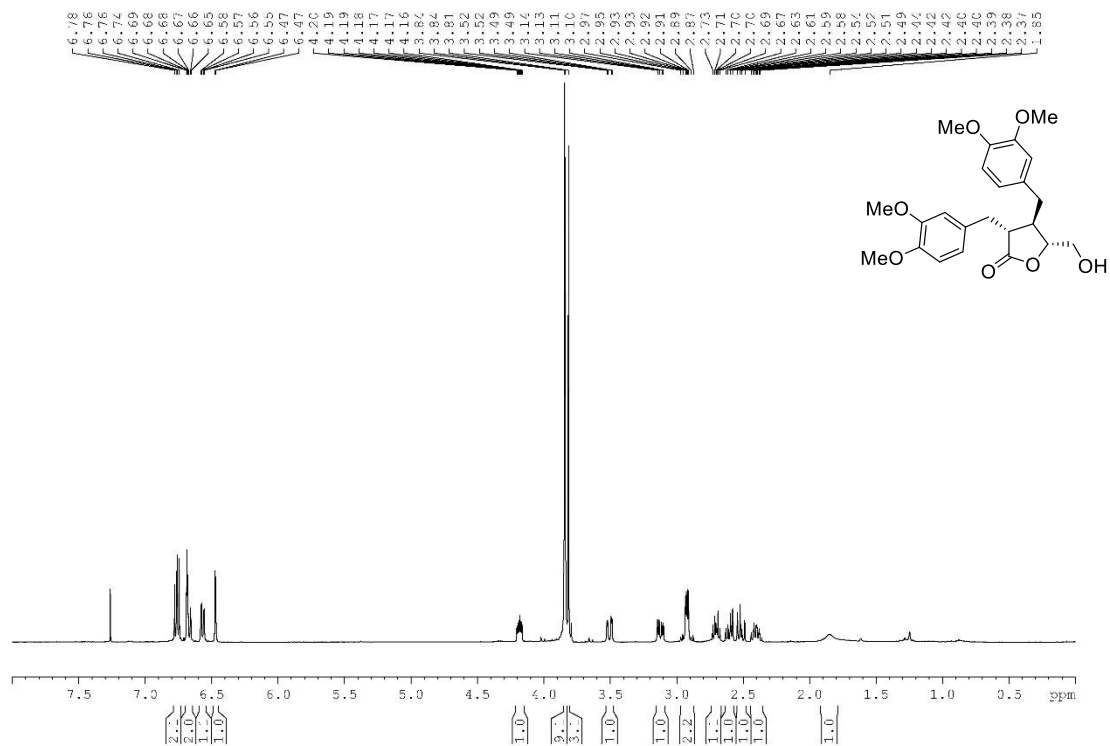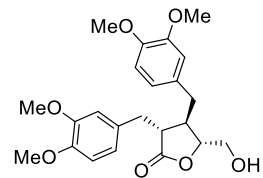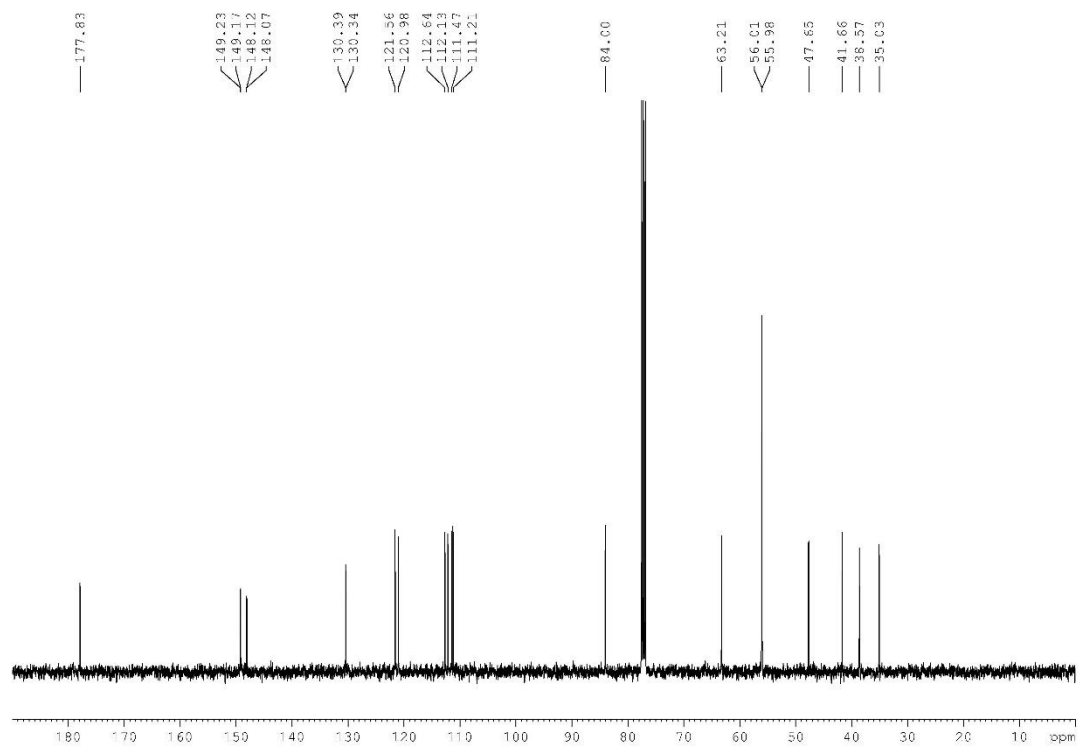

(3*R*\*,4*R*\*)-3-(3',4',5'-Trimethoxybenzyl)-4-(3'',4''-dimethoxybenzyl)-5-(hydroxymethyl) dihydrofuran-2(3*H*)-one **4ac**

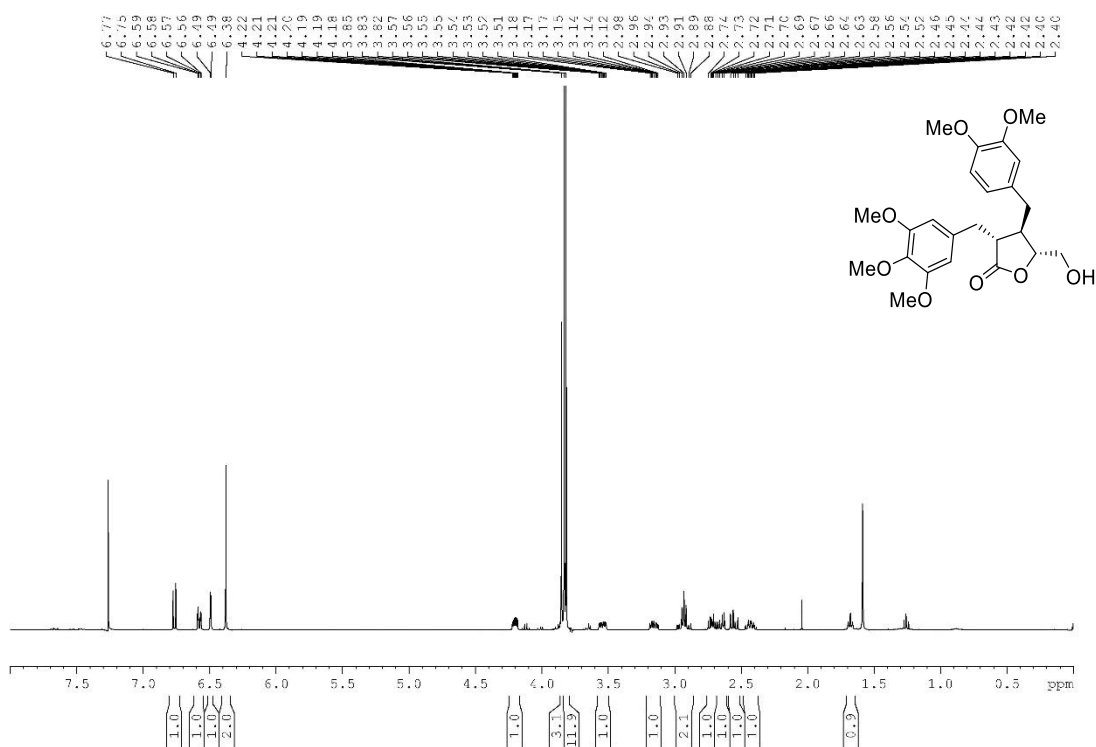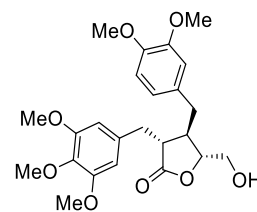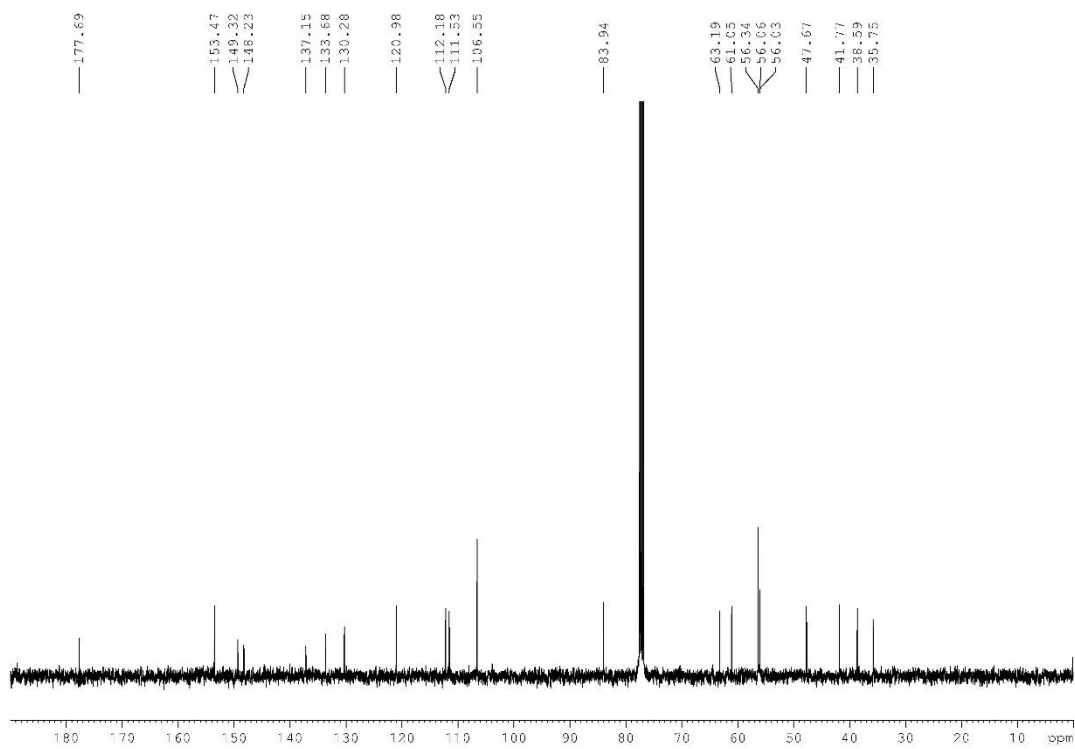

(3*R*\*,4*R*\*)-3-(3'-Methoxy-4'-benzyloxybenzyl)-4-(3'',4''-dimethoxybenzyl)-5-(hydroxymethyl) dihydrofuran-2(3*H*)-one **4ad**

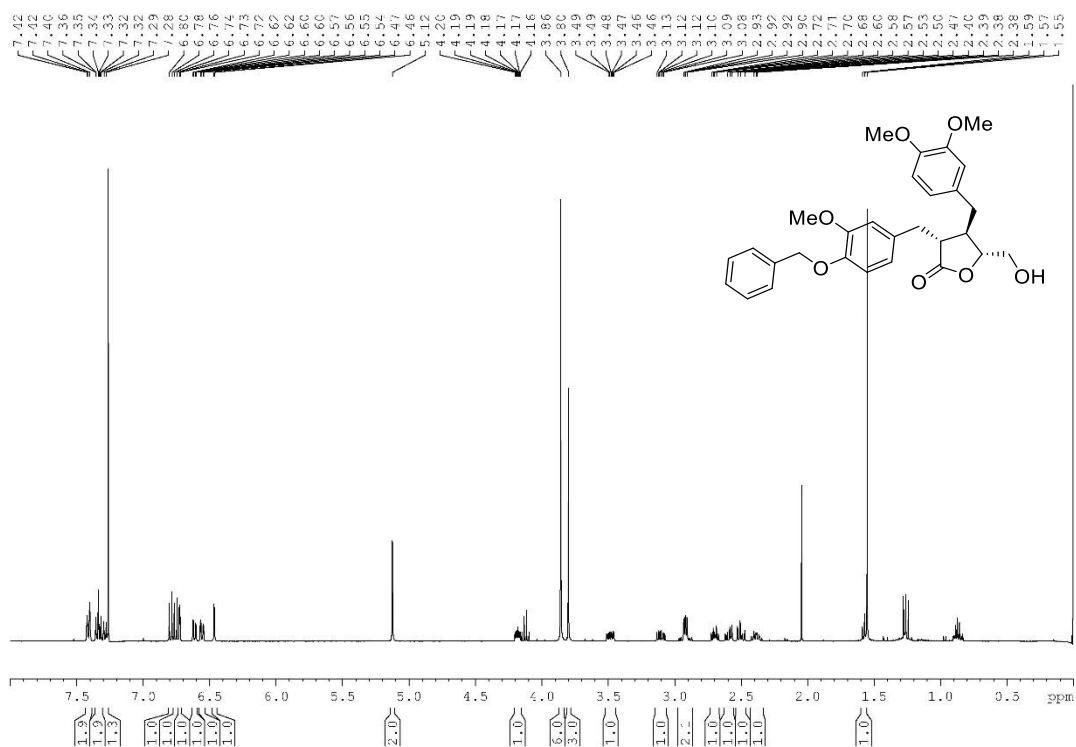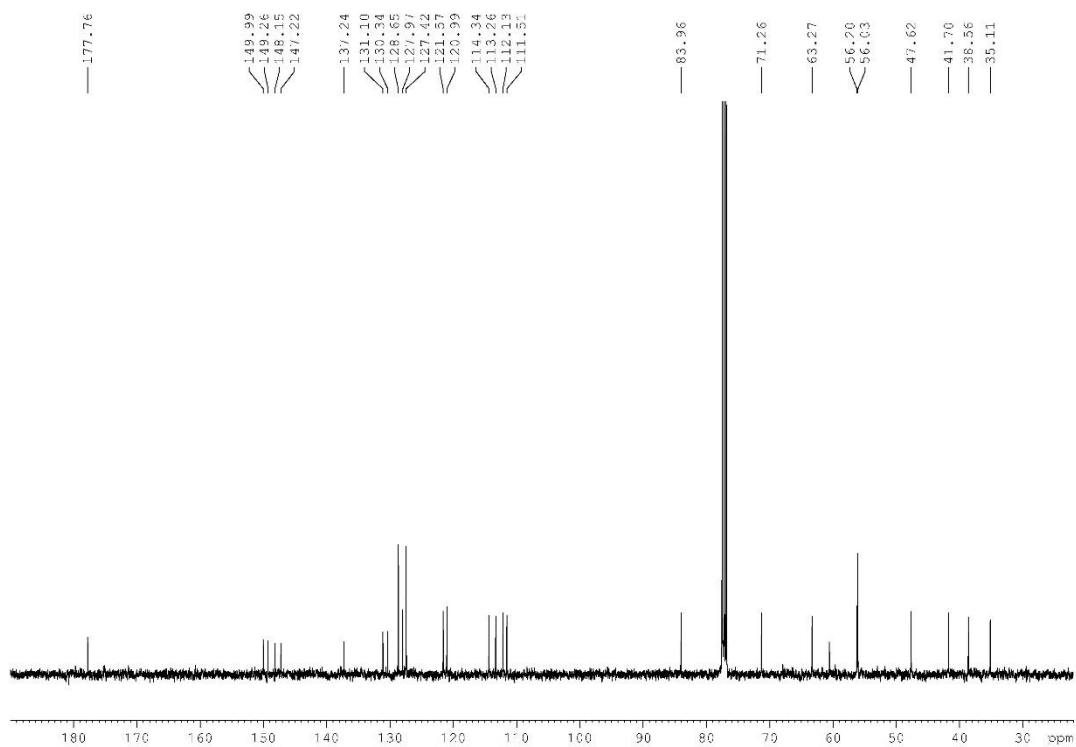

(3*R*\*,4*R*\*,5*S*\*)-4-(3'',4''-Dimethoxybenzyl)-3-(4'-hydroxy-3'-methoxybenzyl)-5-(hydroxymethyl)dihydrofuran-2(3*H*)-one **4ae**

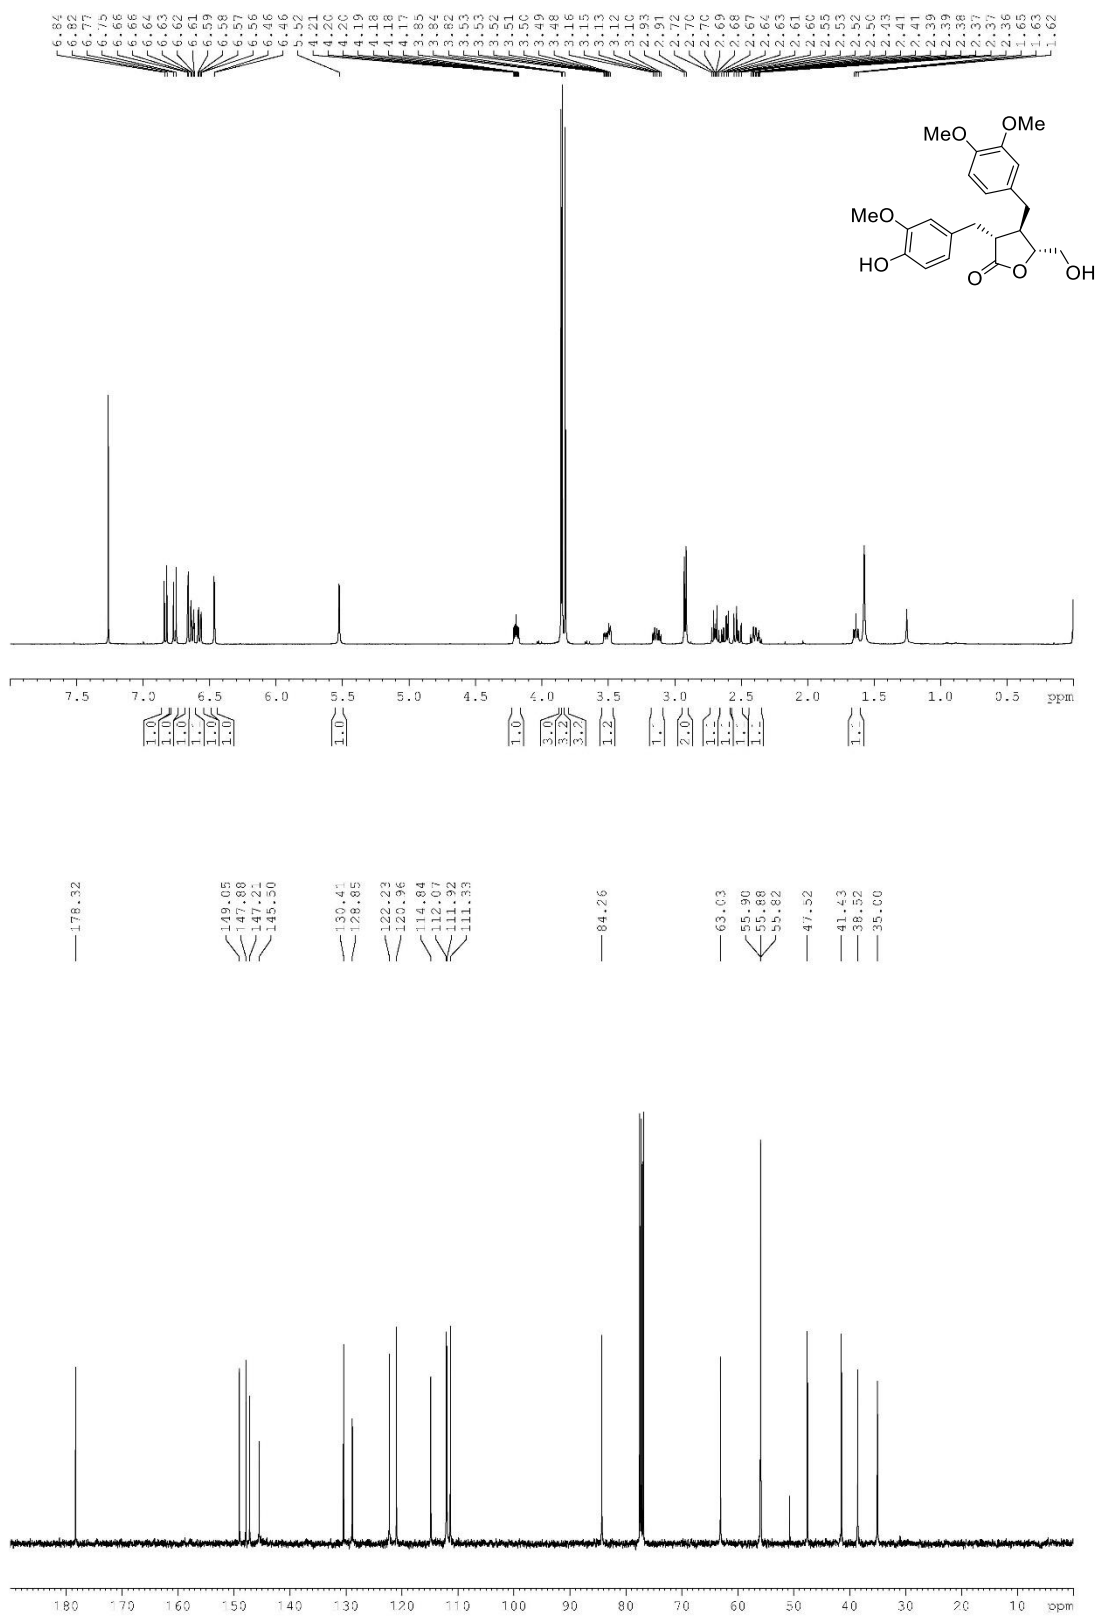

(3*R*\*,4*R*\*)-3,4-bis(3',4'-Methylenedioxybenzyl)-5-(hydroxymethyl)dihydrofuran-2(3*H*)-one **4bb**

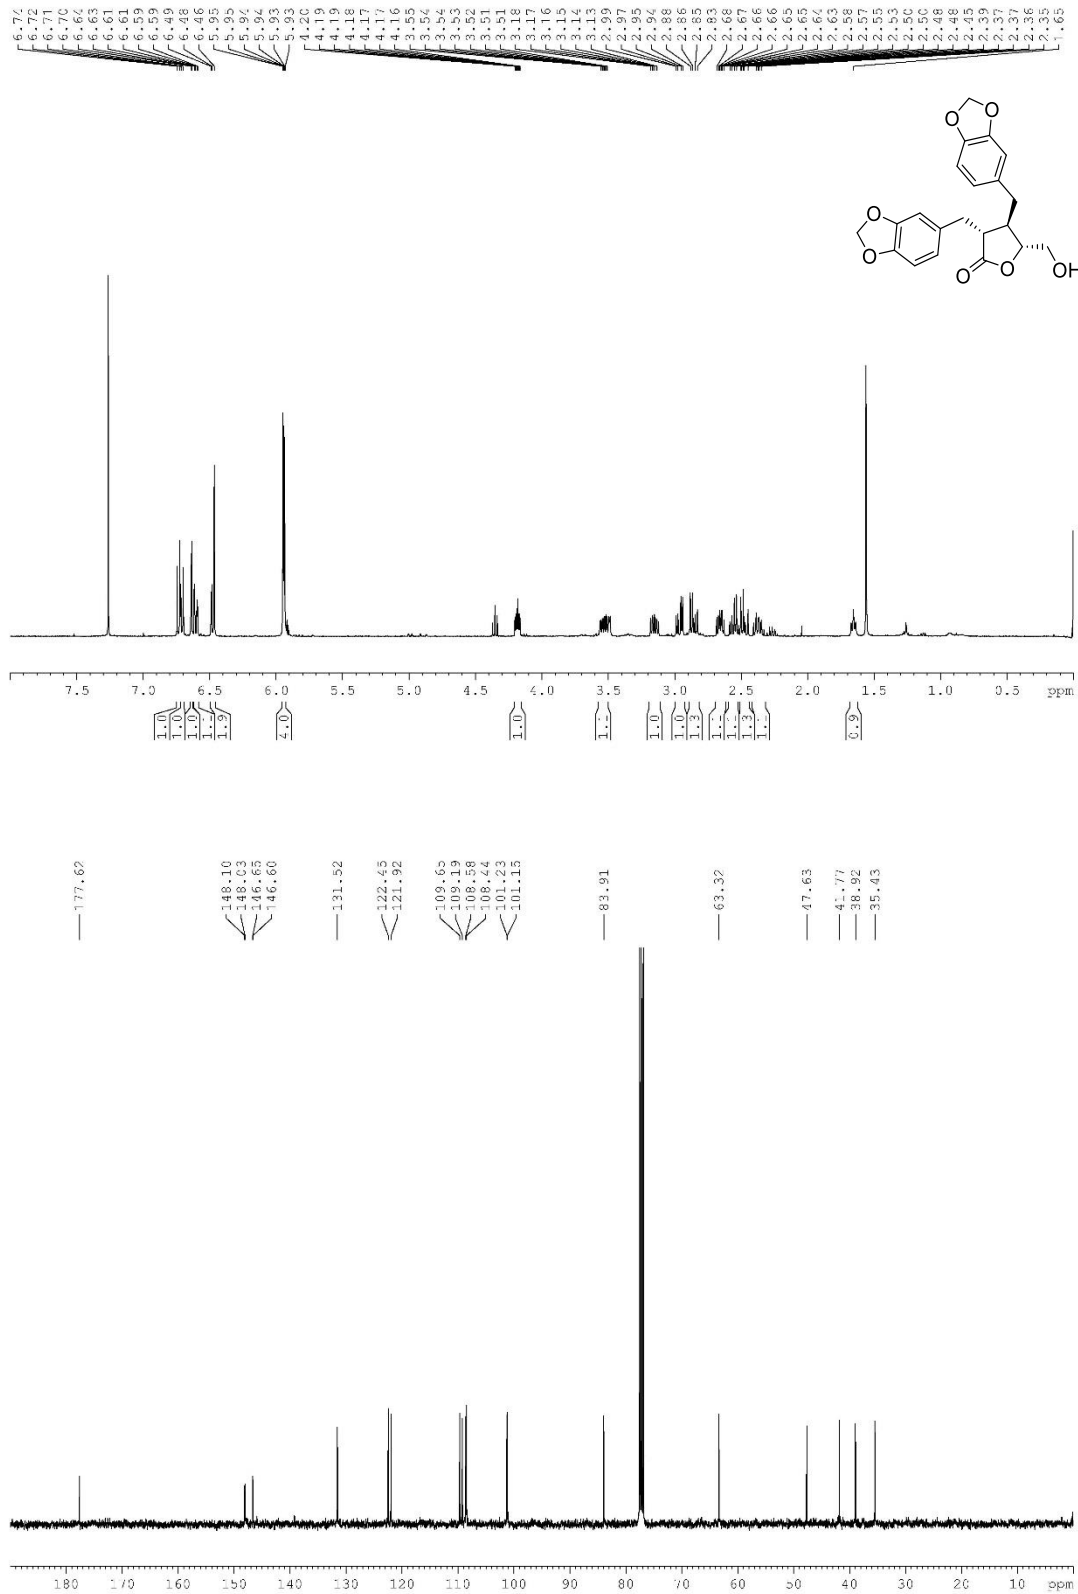



(3*R*\*,4*R*\*)-3,4-bis(3',4'-Methylenedioxybenzyl)-5-(hydroxymethyl)dihydrofuran-2(3*H*)-one (*epi*-4**bb**)

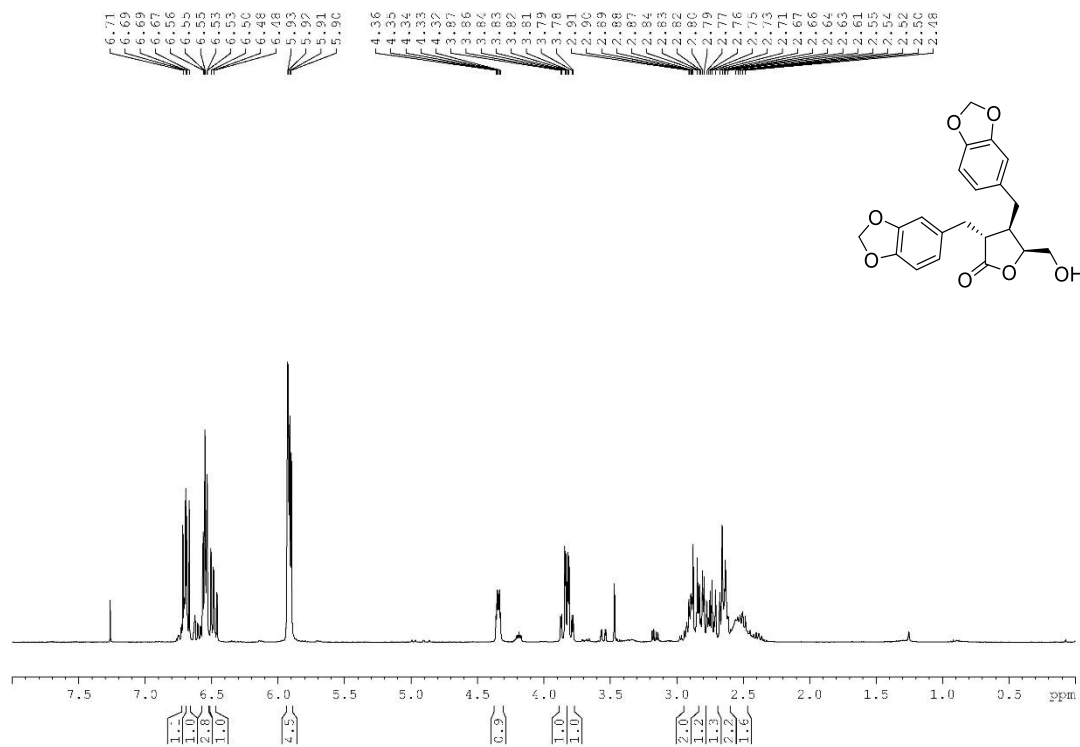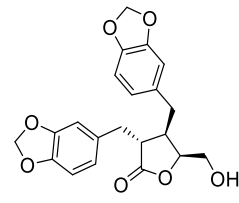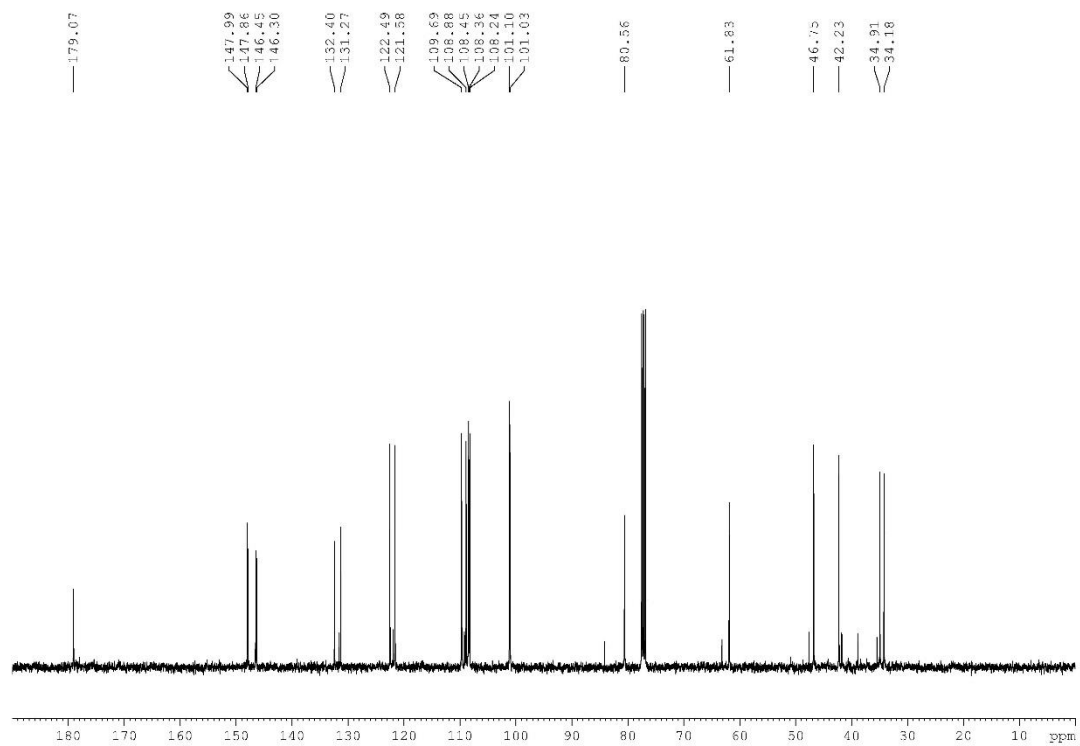

(3*R*\*,4*R*\*)-3-(3',4'-Dimethoxybenzyl)-4-(3'',4''-methylenedioxybenzyl)-5-(hydroxymethyl)dihydrofuran-2(3*H*)-one **4ba**

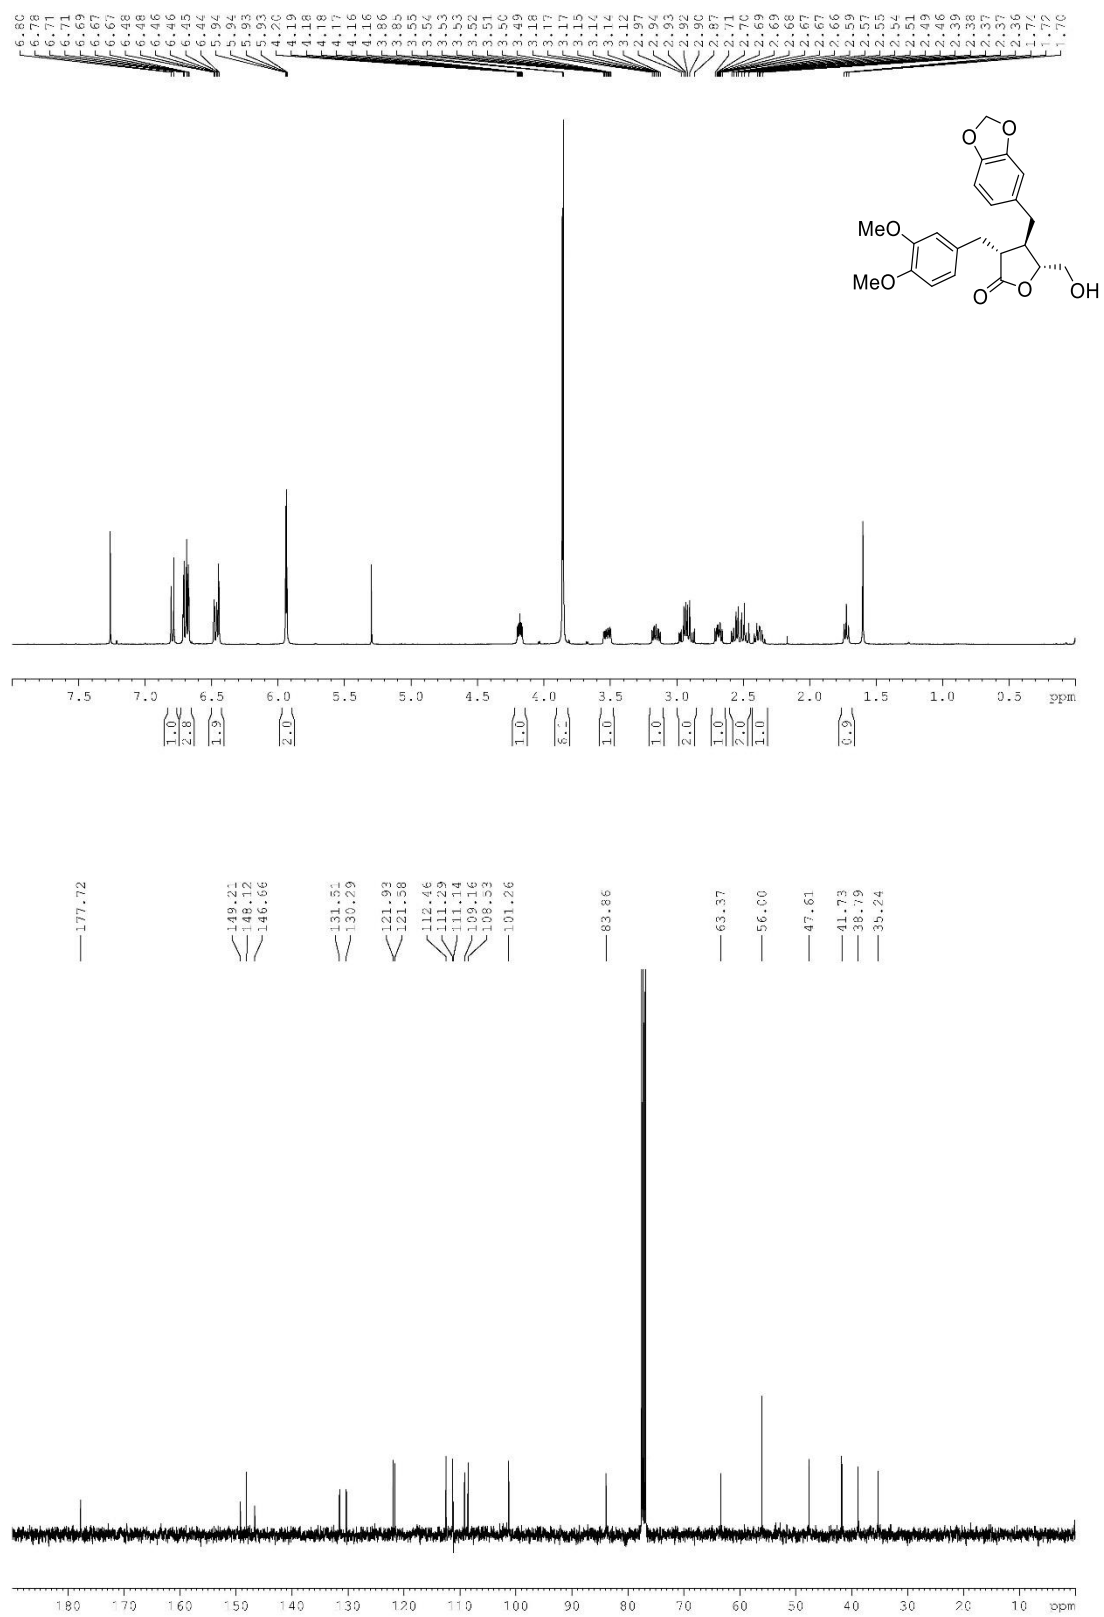

(3*R*\*,4*R*\*)-3-(3',4',5'-Trimethoxybenzyl)-4-(3'',4''-methylenedioxybenzyl)-5-(hydroxymethyl) dihydrofuran-2(3*H*)-one **4bc**

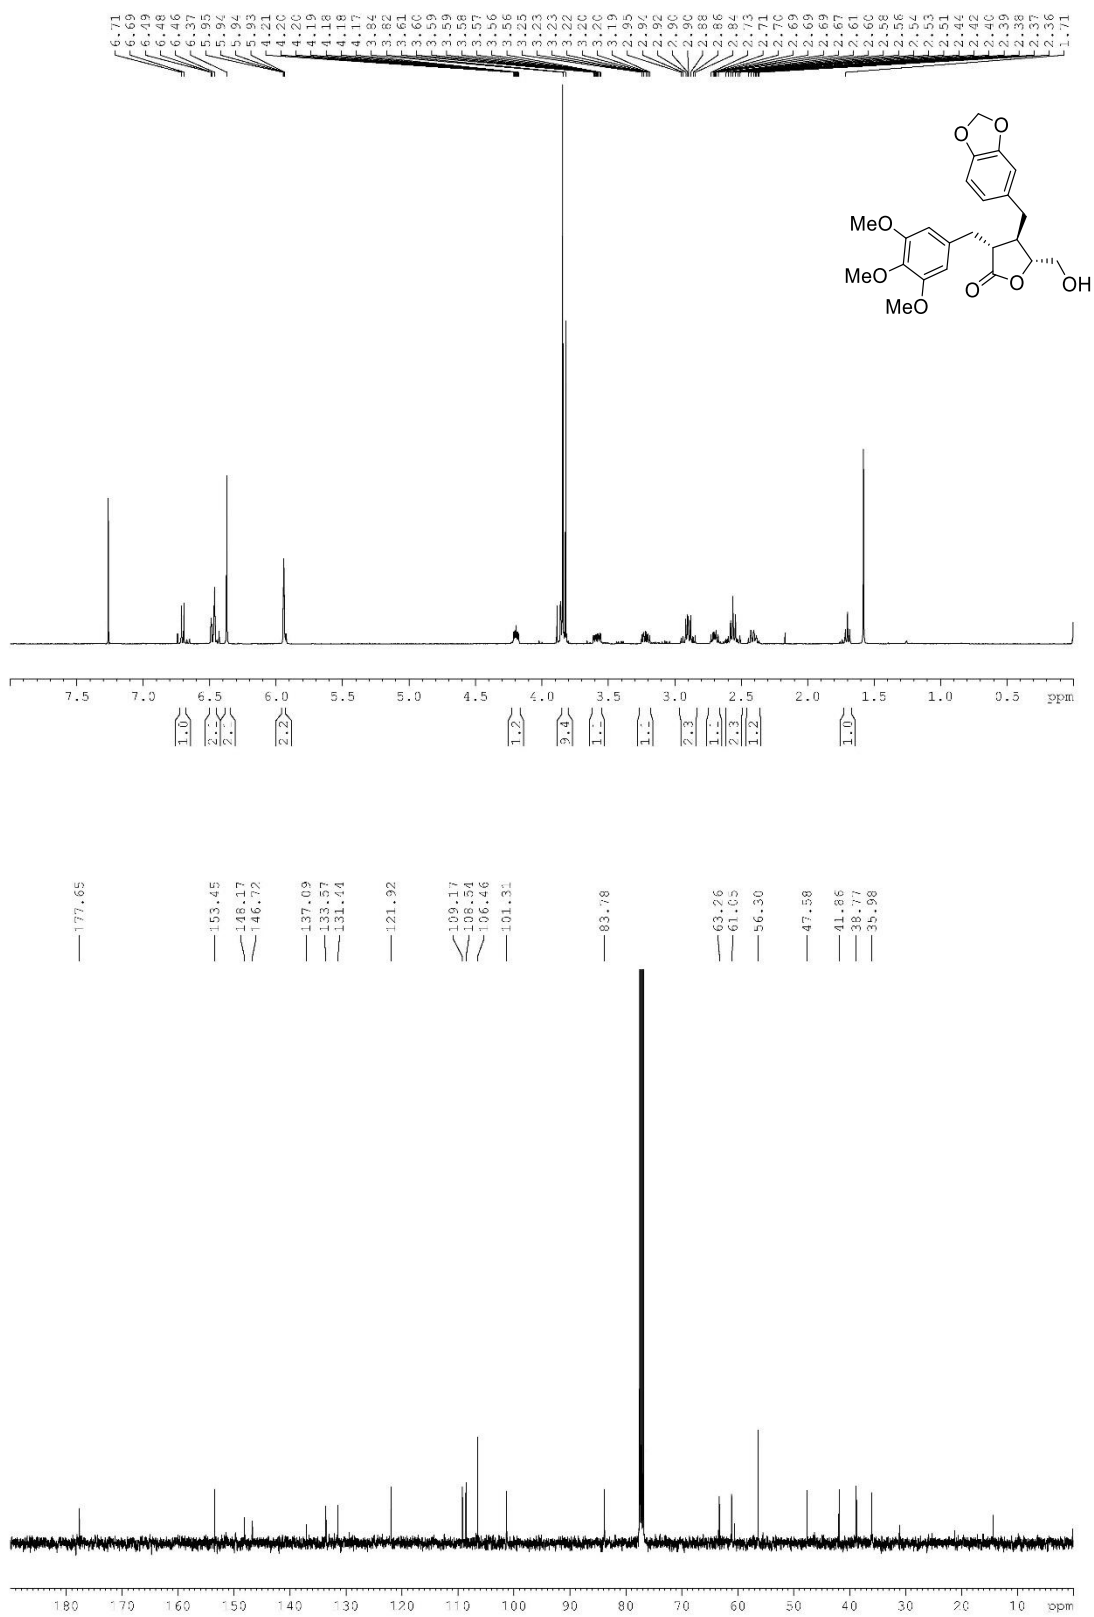

(3*R*\*,4*R*\*)-3-(3'-Methoxy-4'-benzyloxybenzyl)-4-(3'',4''-methylenedioxybenzyl)-5-(hydroxymethyl) dihydrofuran-2(3*H*)-one **4bd**

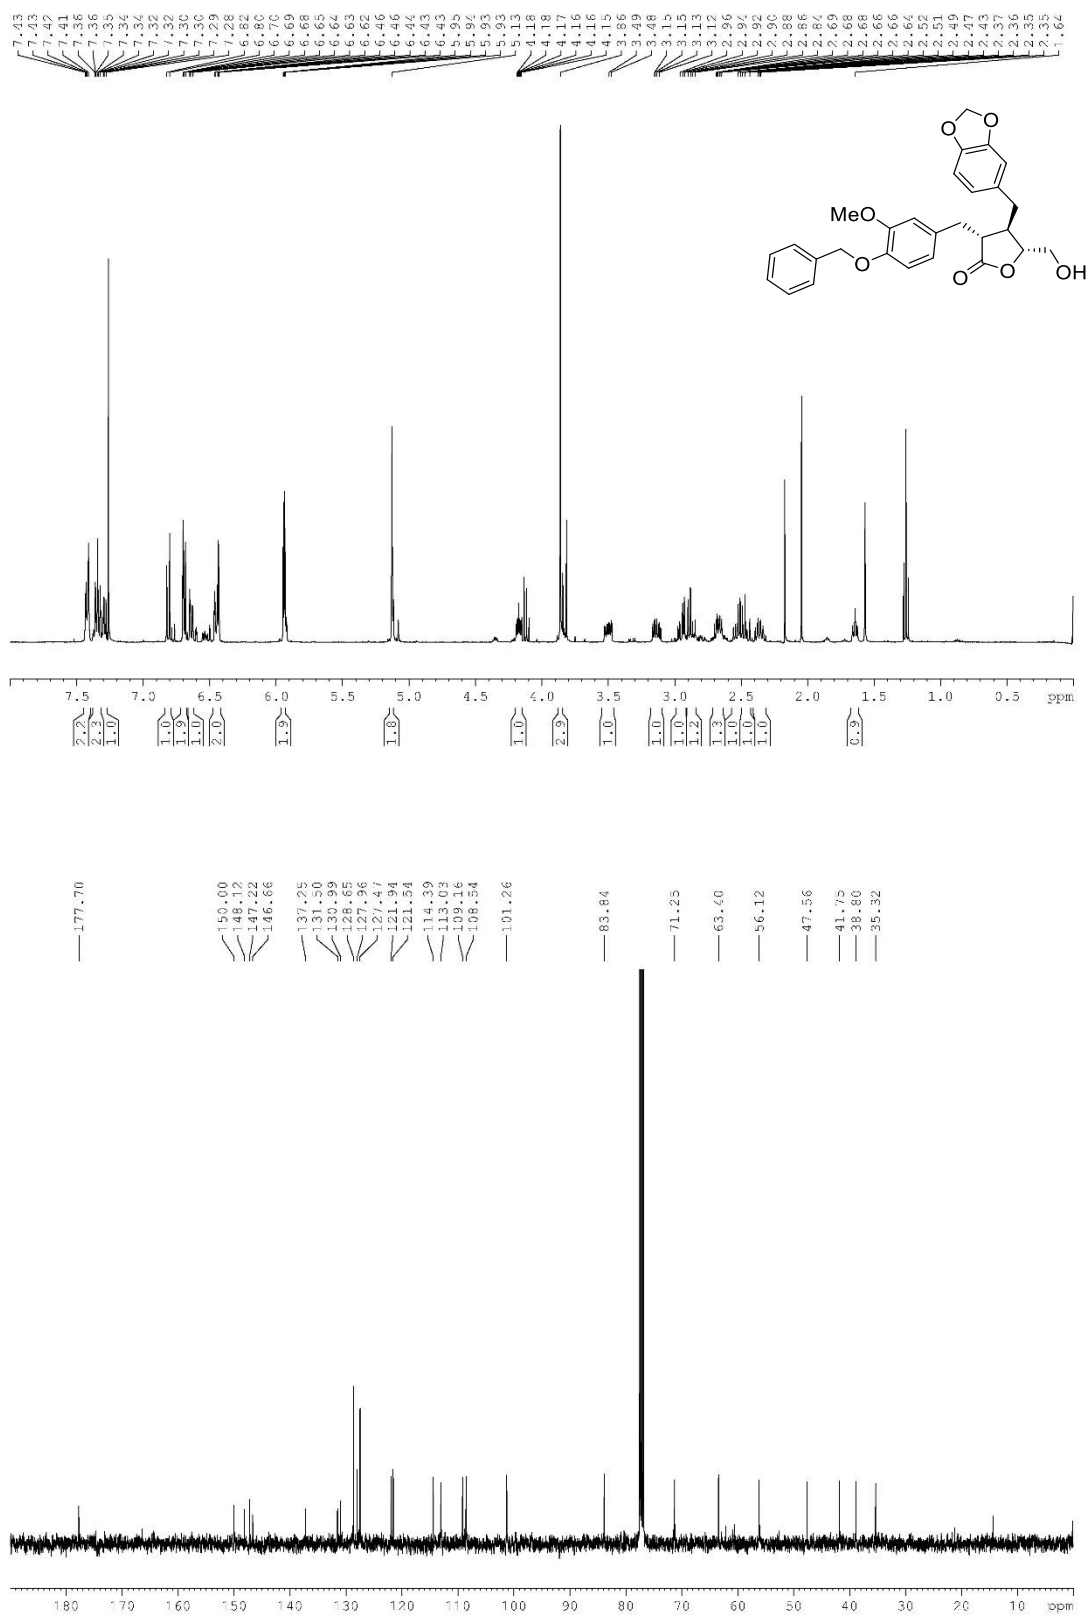

(3*R*\*,4*R*\*,5*S*\*)-4-(3'',4''-Methylenedioxybenzyl)-3-(4'-hydroxy-3'-methoxybenzyl)-5-(hydroxymethyl)dihydrofuran-2(3H)-one **4be**

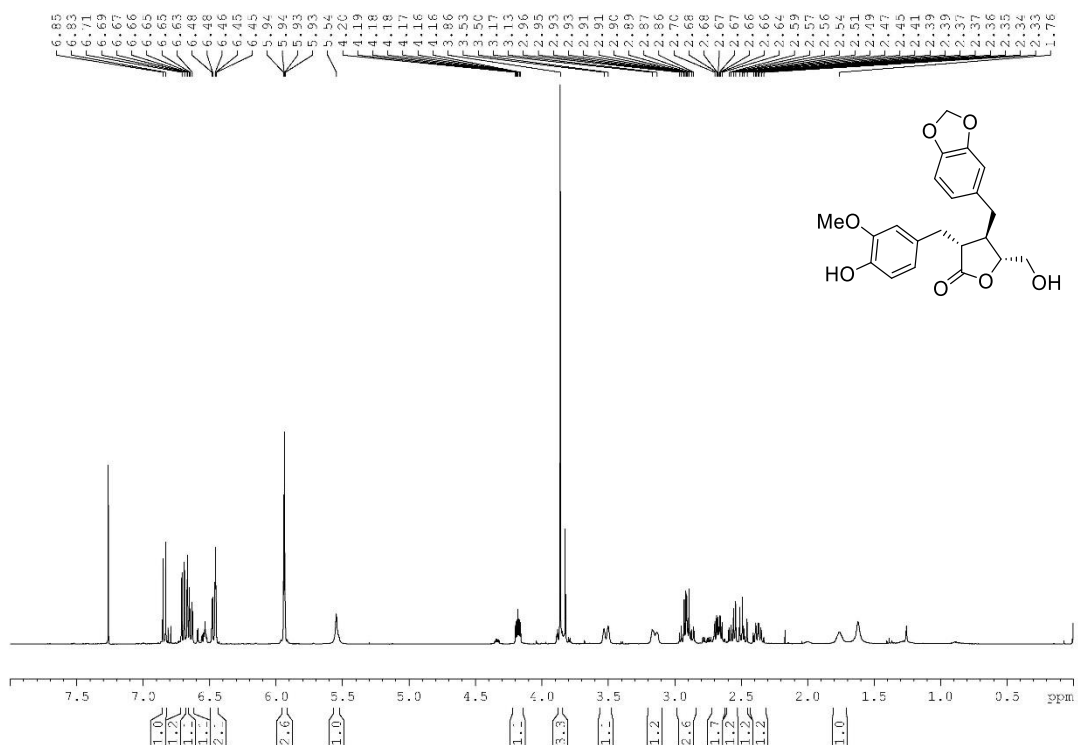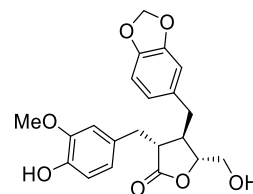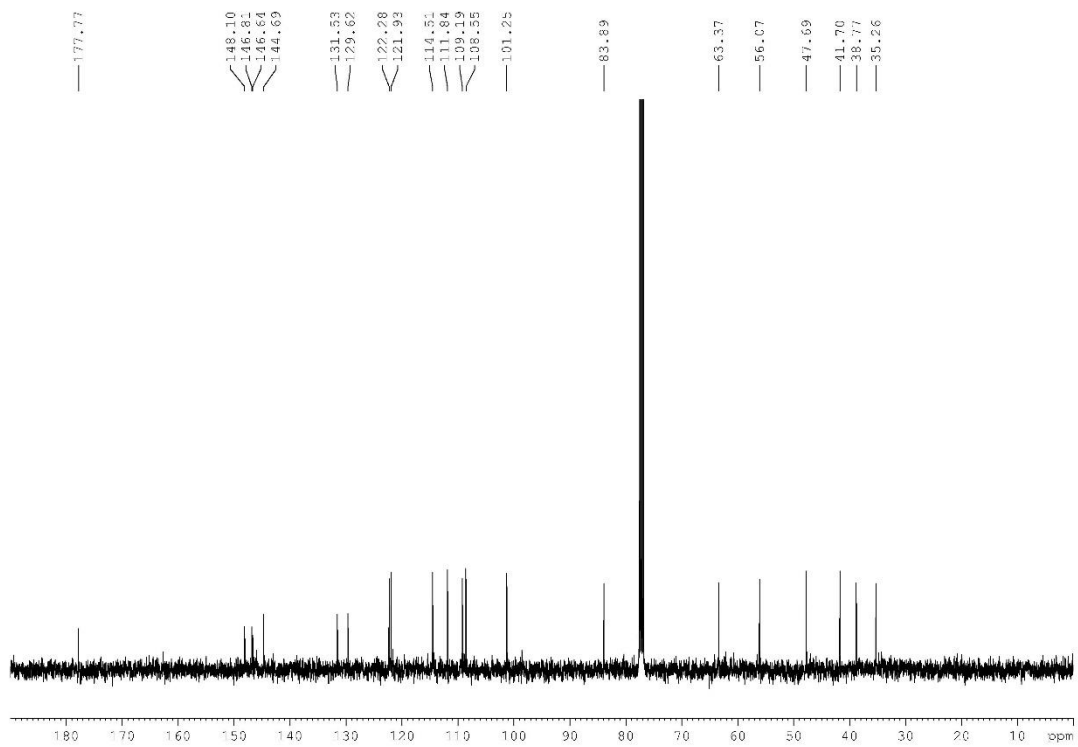

(±)-Bursehernin 1ab

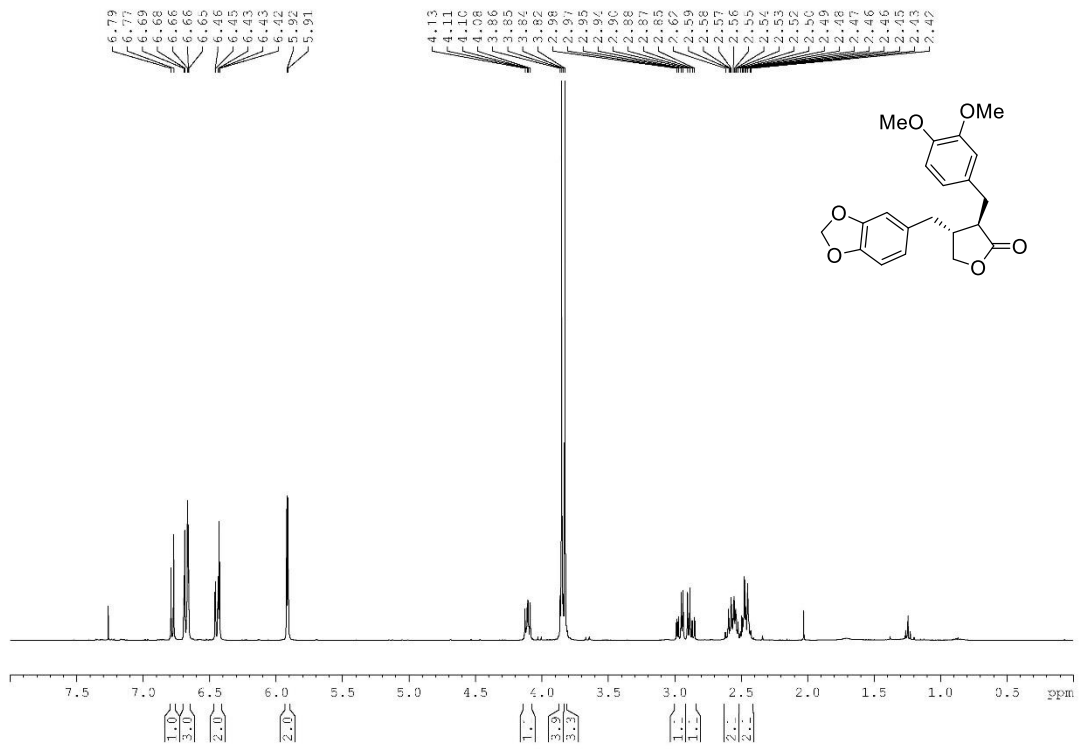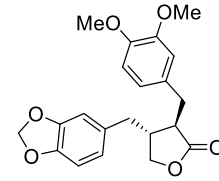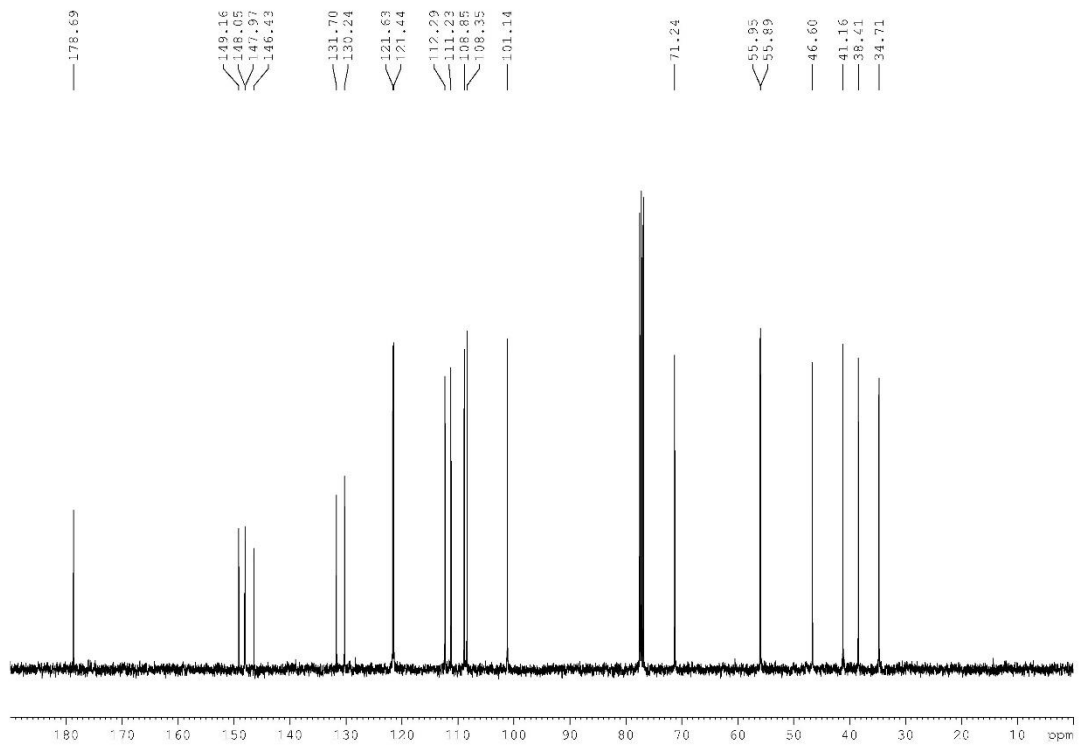

(±)-Arcitin **1aa**

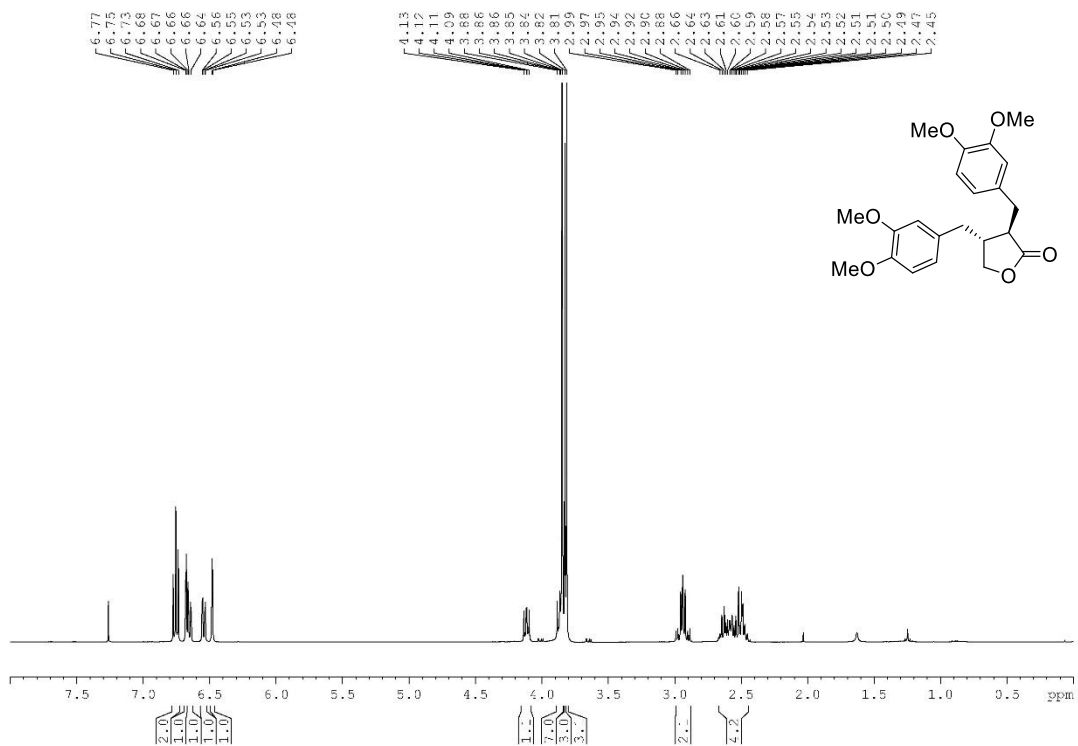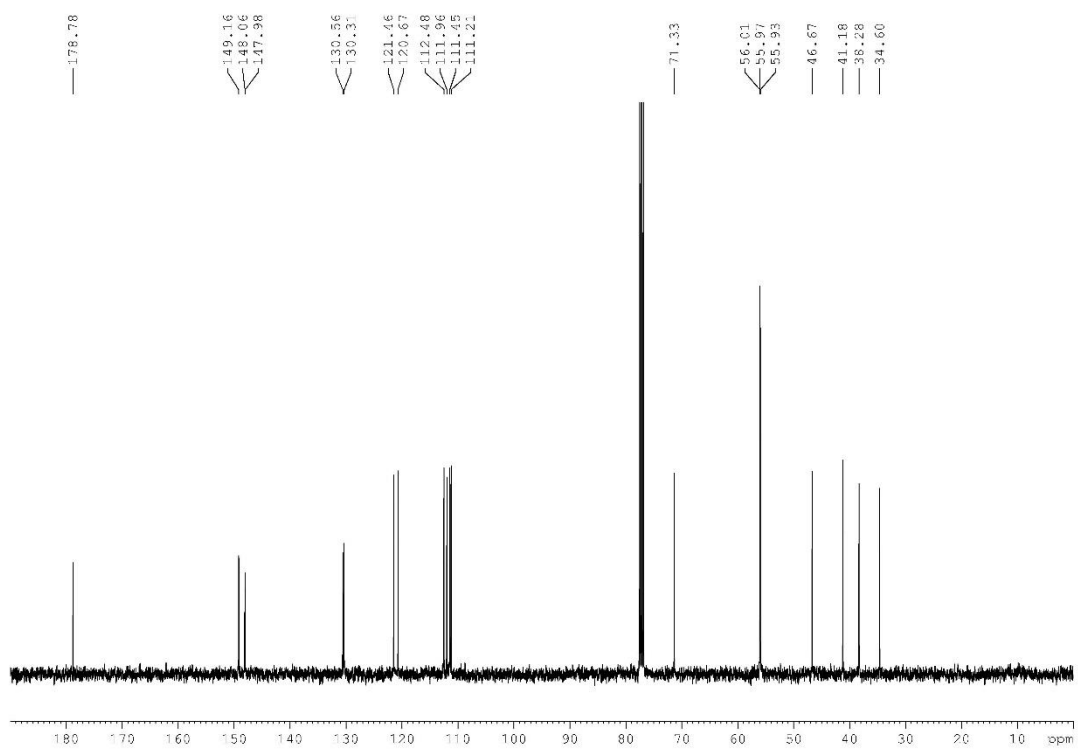







(±)-Buplerol **1ae**

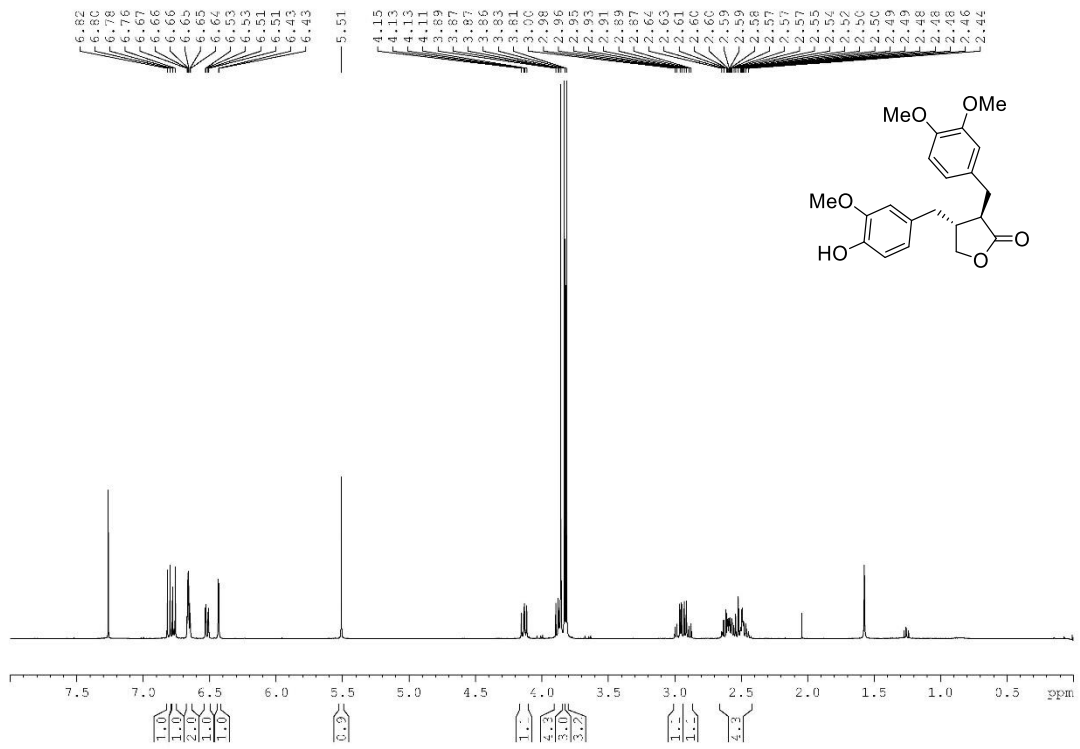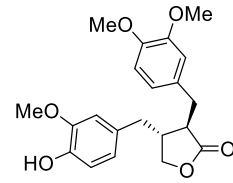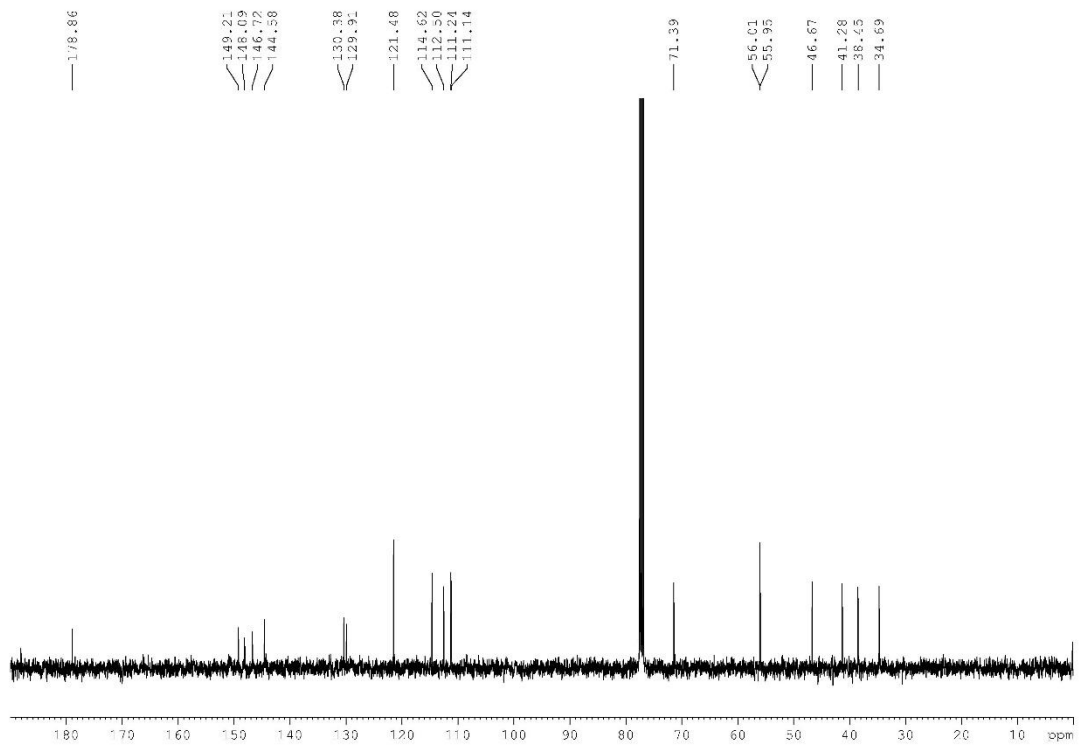

(±)-Hinokinin **1bb**

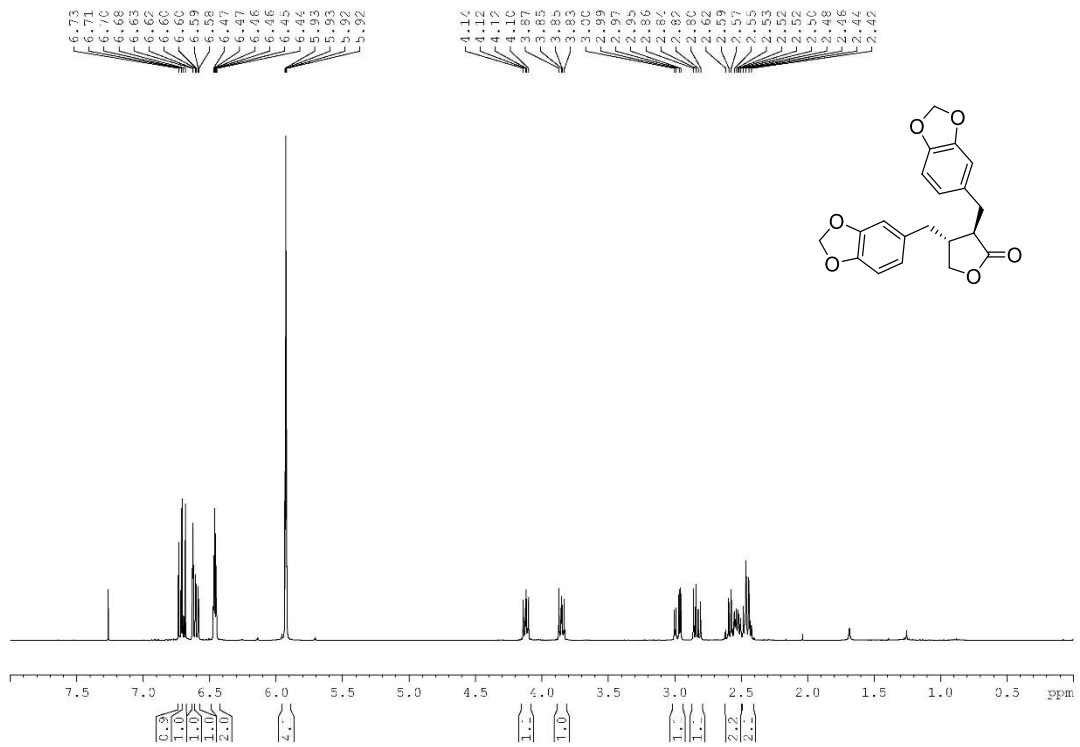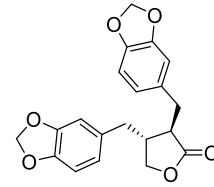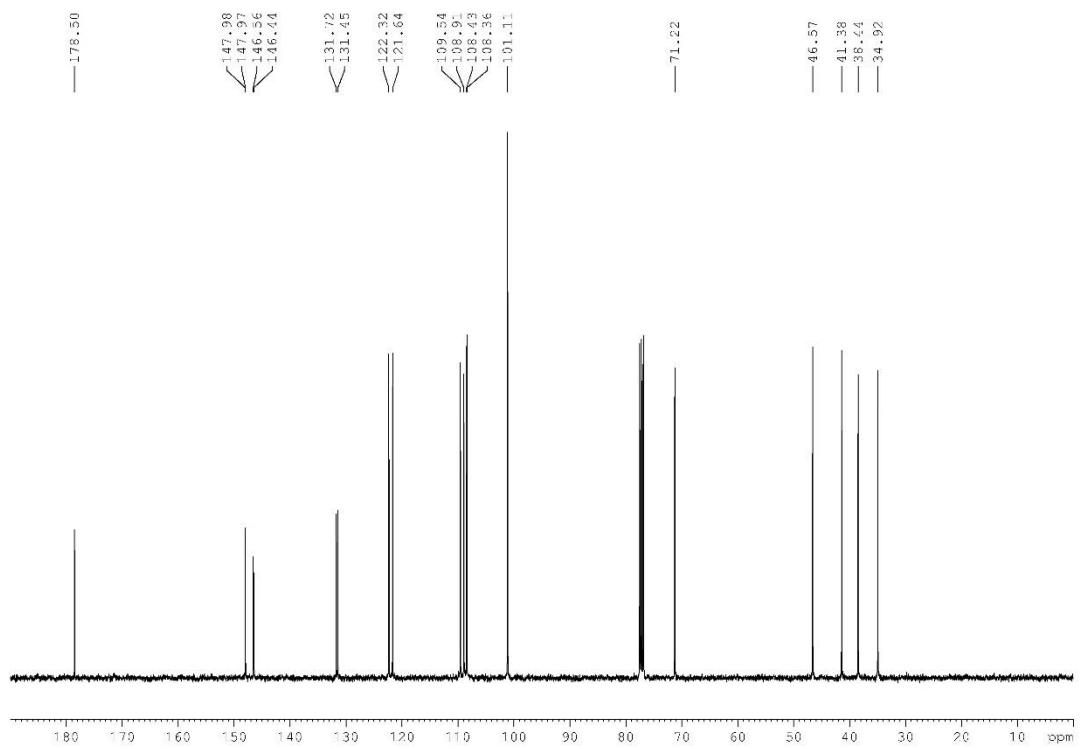



(±)-Isoyatein 1bc

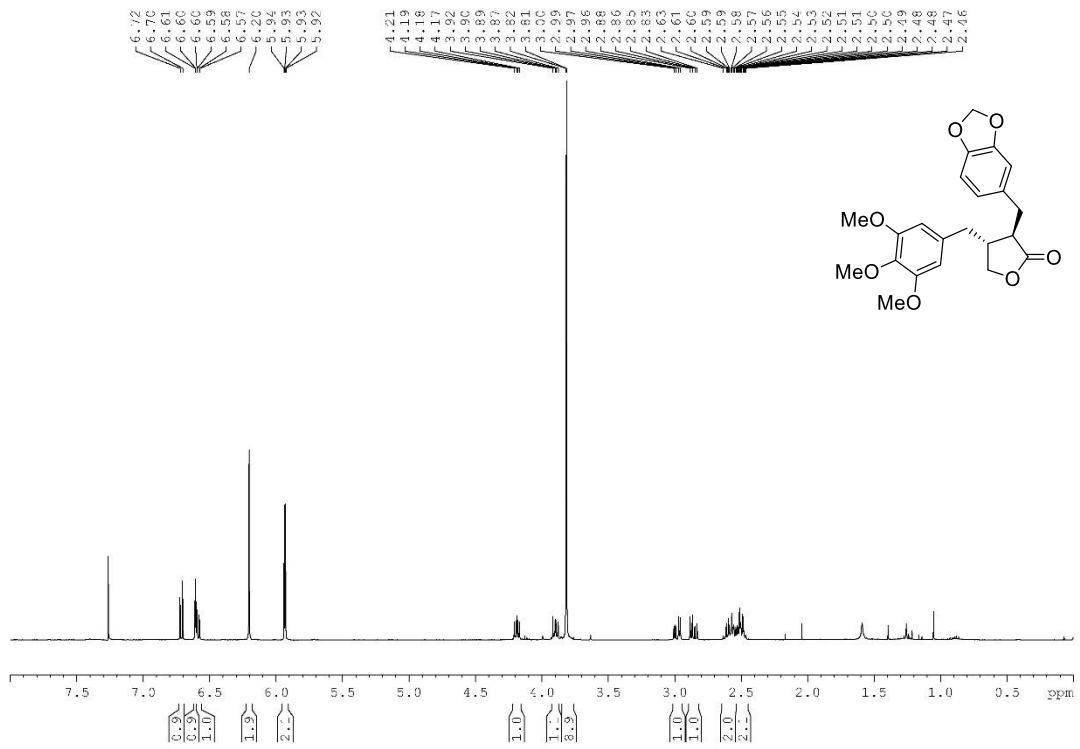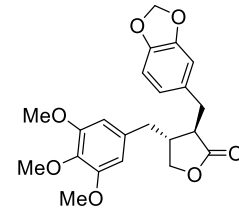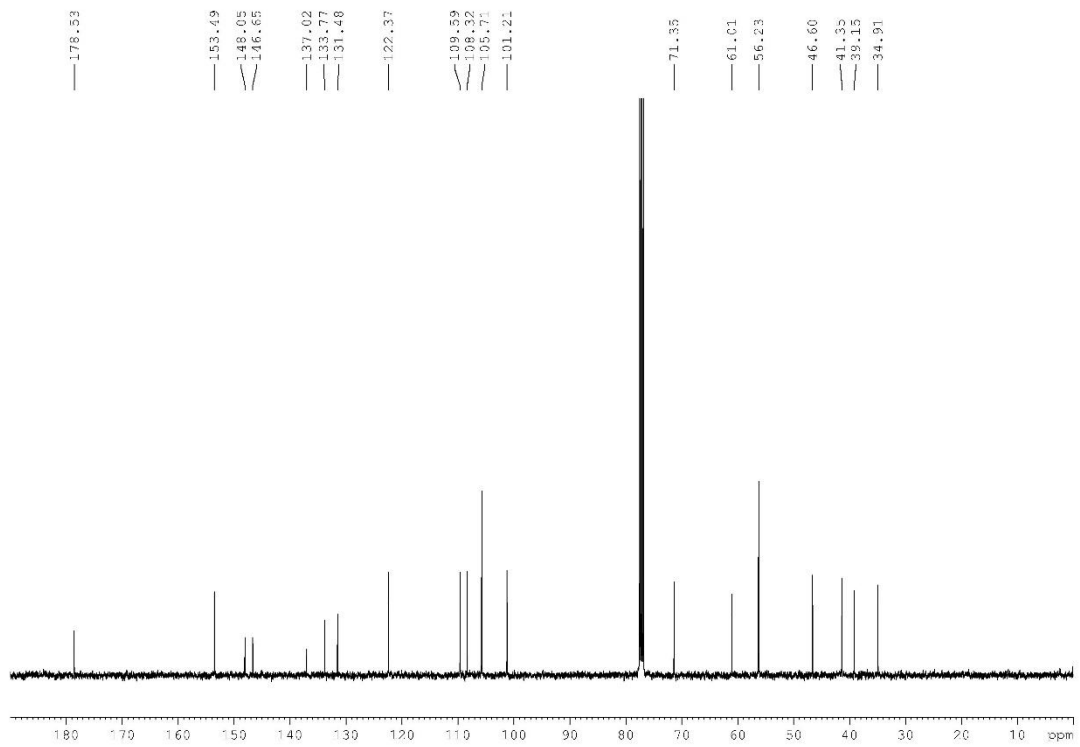

(±)-4'-O-Benzyl haplomyrfolin **1bd**

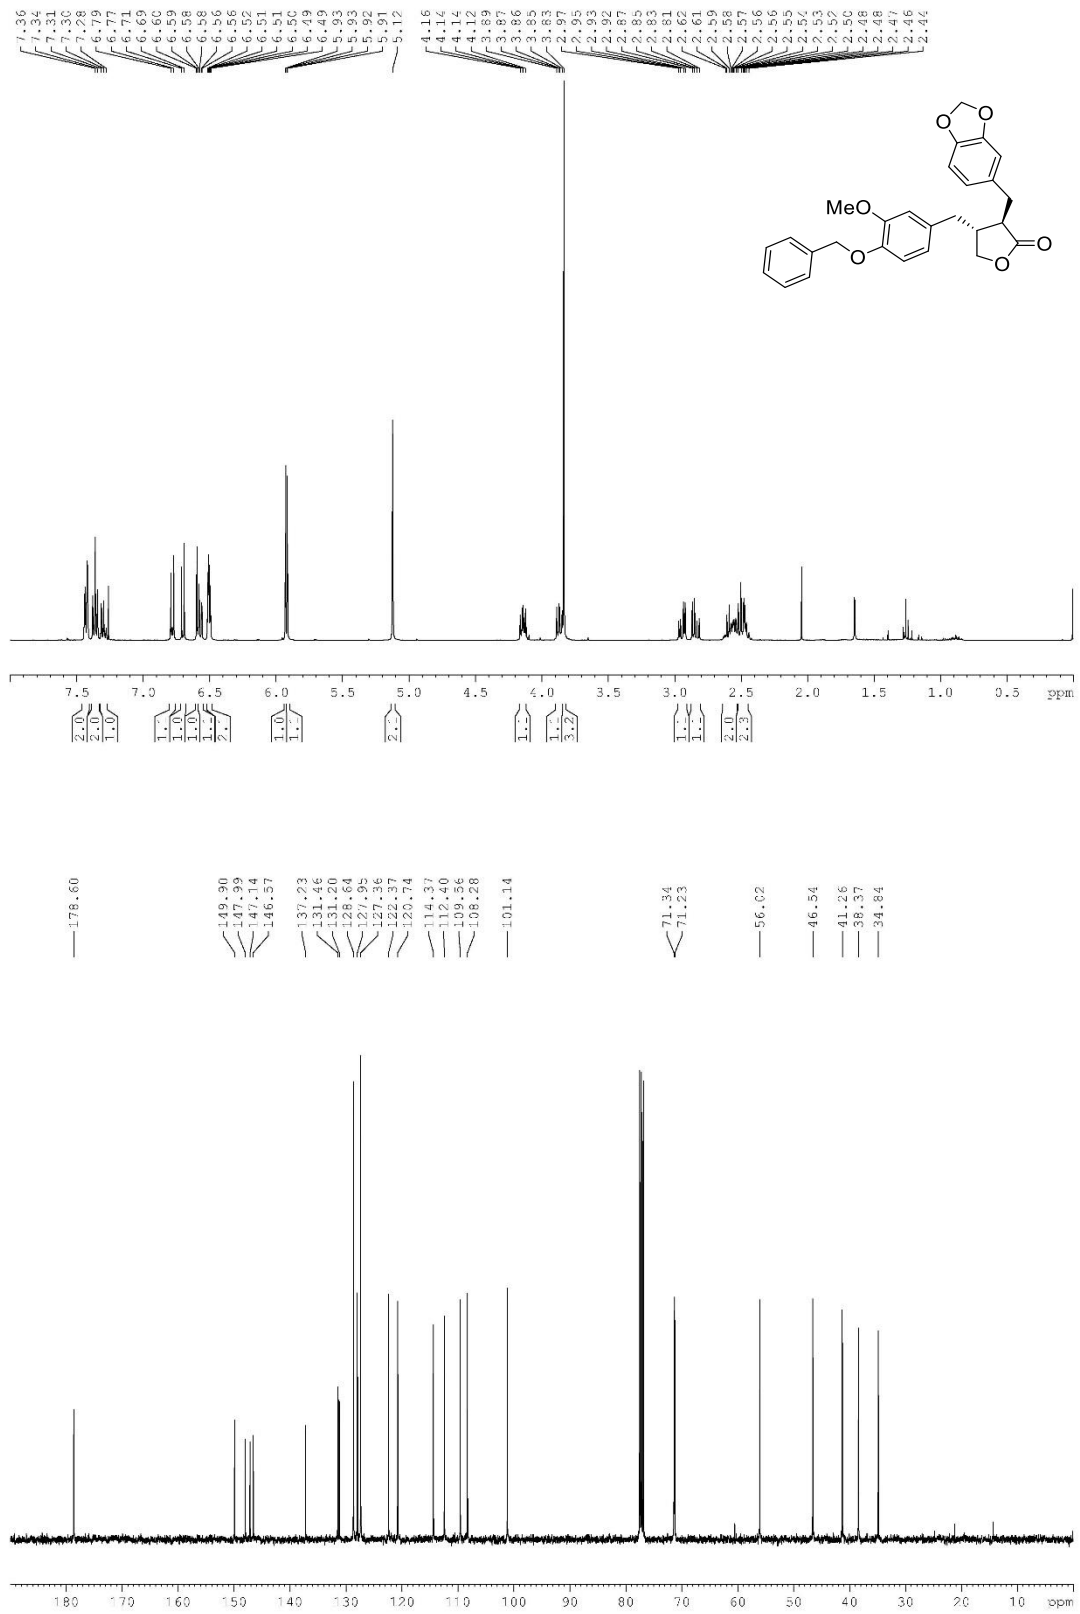

Supplement: molecules-23-03057-s001.pdf [file molecules-23-03057-s001.pdf]
